# Supplementary material for: A dinuclear copper(ii) complex with photoswitchable catechol oxidation activity
Source: Royal Society of Chemistry journal article supplement (doi:10.1039/d2cc06250j), 2022-12-22
Supplement: d2cc06250j1.pdf [file d2cc06250j1.pdf]

Supporting Information

# A dinuclear copper(II) complex with photoswitchable catechol oxidation activity

Michela Marcon<sup>‡</sup>, Stefano Crespi<sup>§</sup>, Andreas Pielmeier<sup>‡</sup> and Burkhard König<sup>‡</sup>

<sup>‡</sup>*Faculty of Chemistry and Pharmacy, University of Regensburg, Universitätsstraße 31, 93053 Regensburg, Germany*

<sup>§</sup>*Department of Chemistry, Ångström Laboratories, Uppsala University, Box 523, 751 20 Uppsala, Sweden*

*E-mail: burkhard.koenig@ur.de*

## Table of Contents

|       |                                                                                                                                                 |    |
|-------|-------------------------------------------------------------------------------------------------------------------------------------------------|----|
| A.    | General Information.....                                                                                                                        | 3  |
| B.    | Synthesis of the ligand .....                                                                                                                   | 4  |
| B.1.  | 1-methyl-4-nitrosobenzene (2a).....                                                                                                             | 4  |
| B.2.  | 1-methyl-3-nitrosobenzene (2b).....                                                                                                             | 4  |
| B.3.  | ( <i>E</i> )-1,2-di- <i>p</i> -tolyl diazene (3a).....                                                                                          | 4  |
| B.4.  | ( <i>E</i> )-1,2-di- <i>m</i> -tolyl diazene (3b).....                                                                                          | 4  |
| B.5.  | ( <i>E</i> )-1-phenyl-2-( <i>p</i> -tolyl) diazene (3c) .....                                                                                   | 4  |
| B.6.  | ( <i>E</i> )-1,2-bis(4-(bromomethyl)phenyl) diazene (4a) .....                                                                                  | 5  |
| B.7.  | ( <i>E</i> )-1,2-bis(3-(bromomethyl)phenyl) diazene (4b).....                                                                                   | 5  |
| B.8.  | ( <i>E</i> )-1-(4-(bromomethyl)phenyl)-2-phenyl diazene (4c).....                                                                               | 5  |
| B.9.  | ( <i>E</i> )-1,1'-(diazene-1,2-diylbis(4,1-phenylene))bis(N,N-bis(pyridin-2-ylmethyl) methanamine) (5a)<br>5                                    | 5  |
| B.10. | ( <i>E</i> )-1,1'-(diazene-1,2-diylbis(3,1-phenylene))bis(N,N-bis(pyridin-2-ylmethyl) methanamine) (5b)<br>5                                    | 5  |
| B.11. | ( <i>E</i> )-N-(4-(phenyldiazenyl)benzyl)-1-(pyridin-2-yl)-N-(pyridin-2-ylmethyl) methanamine (5c) .....                                        | 6  |
| B.12. | [( <i>E</i> )-1,1'-(diazene-1,2-diylbis(4,1-phenylene))bis(N,N-bis(pyridin-2-ylmethyl) methanamine)][CuCl <sub>2</sub> ] <sub>2</sub> (1a)..... | 6  |
| B.13. | [( <i>E</i> )-1,1'-(diazene-1,2-diylbis(3,1-phenylene))bis(N,N-bis(pyridin-2-ylmethyl) methanamine)][CuCl <sub>2</sub> ] <sub>2</sub> (1b)..... | 7  |
| B.14. | [( <i>E</i> )-N-(4-(phenyldiazenyl)benzyl)-1-(pyridin-2-yl)-N-(pyridin-2-ylmethyl) methanamine] [CuCl <sub>2</sub> ] <sub>2</sub> (1c) 7        | 7  |
| C.    | Photophysical properties .....                                                                                                                  | 8  |
| C.1.  | UV-vis spectra.....                                                                                                                             | 8  |
| C.2.  | Calculation of the PSD .....                                                                                                                    | 12 |
| D.    | UV-vis kinetic experiments .....                                                                                                                | 14 |
| D.1.  | Experimental setup .....                                                                                                                        | 14 |
| D.2.  | UV-vis kinetics.....                                                                                                                            | 14 |
| E.    | Crystallographic data .....                                                                                                                     | 17 |
| F.    | NMR spectra.....                                                                                                                                | 22 |
| G.    | IR spectra.....                                                                                                                                 | 28 |
| H.    | Cartesian coordinates .....                                                                                                                     | 28 |
| I.    | References.....                                                                                                                                 | 28 |

## A. General Information

Starting materials and reagents were purchased from commercial suppliers (Sigma Aldrich, Alfa Aesar, Acros, Fluka, TCI or VWR) and used without further purification. Solvents were used as p.a. grade or distilled. Dry solvents were dried over molecular sieves. For automated flash column chromatography industrial grade of solvents was used. All NMR spectra were measured at room temperature using a Bruker Avance 300 (300 MHz for  $^1\text{H}$ , 75 MHz for  $^{13}\text{C}$ , 282 MHz for  $^{19}\text{F}$ ) or a Bruker Avance 400 (400 MHz for  $^1\text{H}$ , 101 MHz for  $^{13}\text{C}$ , 376 MHz for  $^{19}\text{F}$ ) NMR spectrometer. All chemical shifts are reported in  $\delta$ -scale as parts per million [ppm] (multiplicity, coupling constant  $J$ , number of protons) relative to the solvent residual peaks as the internal standard. Coupling constants  $J$  are given in Hertz [Hz]. Abbreviations used for signal multiplicity:  $^1\text{H}$ -NMR: b = broad, s = singlet, d = doublet, t = triplet, q = quartet, hept = heptet dd = doublet of doublets, dt = doublet of triplets, dq = doublet of quartets, and m = multiplet;  $^{13}\text{C}$ -NMR: (+) = primary/tertiary, (-) = secondary, ( $\text{C}_\text{q}$ ) = quaternary carbon. HRMS (high resolution mass spectra) and LRMS (low resolution mass spectra) were measured at the Central Analytical Laboratory of the University of Regensburg. These mass spectra were recorded on a Finnigan MAT 95, ThermoQuest Finnigan TSQ 7000, Finnigan MAT SSQ 710 A or an Agilent Q-TOF 6540 UHD instrument. Analytical TLC was performed on silica gel coated alumina plates (MN TLC sheets ALUGRAM<sup>®</sup> Xtra SIL G/UV254). Visualization was done by UV light (254 or 366 nm). If necessary, ninhydrin was used for chemical staining. Purification by column chromatography was performed with silica gel 60 M (40-63  $\mu\text{m}$ , 230-440 mesh, Merck) or with a pre-packed Biotage<sup>®</sup> Snap Ultra HP-Sphere<sup>TM</sup> 25  $\mu\text{m}$  column on a Biotage<sup>®</sup> Isolera<sup>TM</sup> Spektra One device. FTIR spectroscopy was carried out on a Cary 630 FTIR Spectrometer and the wave numbers are reported as  $\text{cm}^{-1}$ . For irradiation with UV light Luminus SST-10 UV LT-4787(UV,  $\lambda_{\text{max}} = 365 \text{ nm}$ ,  $I_{\text{max}} = 500 \text{ mA}$ , 875mW) was used. For irradiation with blue light ILH-XC01-S410-SC211-WIR200 (blue,  $\lambda_{\text{max}} = 410 \text{ nm}$ ,  $I_{\text{max}} = 350 \text{ mA}$ , 440mW) was used. UV-Vis absorption spectroscopy was performed at 25°C on a Varian Cary 50 Spectrometer and a Varian Cary 4000 Spetrometer with a 10 mm quartz cuvette. UV-vis absorption kinetics were performed at 25°C on an Agilent 8453 spectrometer with a 10 mm gastight quartz cuvette. For temperature control, a Varian Cary Single cell peltier apparatus was used. The lifetime was measured on a FLUOstar Omega well-plate reader with a Greiner 96 F-bottom well plate covered with an adhesive film to avoid evaporation of the solvent. Computational analysis was employed to optimize the structure of the reduced form of **Z-1a**, **E-1b**, **Z-1b**, **E-1c** and **Z-1c** interacting with molecular oxygen. The geometries was optimized at the  $r^2\text{SCAN-3c}$  level of theory<sup>1</sup> as implemented in the ORCA 5.0.3 software.<sup>2</sup> The nature of the stationary point was confirmed by means of frequency calculations.

## B. Synthesis of the ligand

### B.1. 1-methyl-4-nitrosobenzene (**2a**)

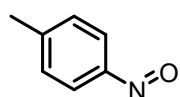

Synthesized according to literature reports.<sup>3</sup> *p*-toluidine (2 g, 18.7 mmol, 1 eq) was dissolved in 40 mL of DCM. To this solution, oxone (11.47 g, 18.7 mmol, 1 eq) dissolved in 50 mL of water was added. The solution immediately turned green and was stirred for 30 min. The crude was extracted with water and DCM. The organic phase was dried over MgSO<sub>4</sub> and concentrated, and the green solution was used for the next step without purification.

<sup>1</sup>H-NMR (300 MHz, Chloroform-*d*): δ 7.81 (d, 2H), 7.39 (d, 2H), 2.45 (s, 3H).

### B.2. 1-methyl-3-nitrosobenzene (**2b**)

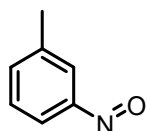

Synthesized following the same procedure as **2a**, starting from *m*-toluidine at 0°C. Green solution used without purification for the next step.

<sup>1</sup>H NMR (300 MHz, Chloroform-*d*): δ 7.78 (dt, *J* = 7.1, 2.0 Hz, 1H), 7.64 (s, 1H), 7.56 – 7.49 (m, 2H), 2.50 (s, 3H).

### B.3. (*E*)-1,2-di-*p*-tolylidiazene (**3a**)

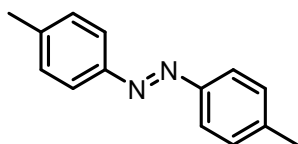

1-methyl-4-nitrosobenzene **2a** (800 mg, 6.60 mmol, 1 eq) and *p*-toluidine (1 eq) were dissolved in 10 mL of acetic acid. The solution was stirred at room temperature overnight. The mixture was extracted with saturated NaHCO<sub>3</sub> and ethyl acetate, washed once with brine and dried. The product was then purified by flash column chromatography (100% PE). The eluate was concentrated by rotary evaporation and an orange solid was obtained in 74% yield.

<sup>1</sup>H-NMR (300 MHz, Chloroform-*d*): δ 7.81 (d, 2H), 7.30 (d, 2H), 2.43 (s, 3H).

### B.4. (*E*)-1,2-di-*m*-tolylidiazene (**3b**)

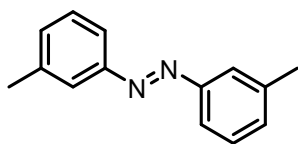

Synthesized following the same procedure as **3a**, starting from **2b**. Orange solid 20% yield.

<sup>1</sup>H NMR (400 MHz, Chloroform-*d*): δ 7.76 – 7.69 (m, 4H), 7.45 – 7.38 (m, 2H), 7.29 (d, *J* = 7.5 Hz, 2H), 2.46 (s, 6H).

### B.5. (*E*)-1-phenyl-2-(*p*-tolyl)diazene (**3c**)

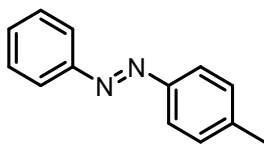

Synthesized following the same procedure as **3a**, starting from commercial nitrosobenzene and *p*-toluidine. Orange solid, 92% yield.

<sup>1</sup>H NMR (400 MHz, Chloroform-*d*): δ 7.91 (d, *J* = 7.1 Hz, 2H), 7.84 (d, *J* = 8.3 Hz, 2H), 7.56 – 7.42 (m, 3H), 7.32 (d, *J* = 8.0 Hz, 2H), 2.44 (s, 3H).

### B.6. (*E*)-1,2-bis(4-(bromomethyl)phenyl)diazene (**4a**)

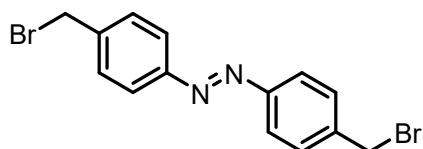

Synthesized according to literature report.<sup>4</sup> To a solution of (*E*)-1,2-di-*p*-tolylidiazene **3a** (420 mg, 2 mmol, 1 eq) in 20 mL

of dry acetonitrile was added N-bromosuccinimide (2.3 eq) and AIBN (0.08 eq). The solution was stirred overnight at 70°C. The volume was reduced by rotary evaporation. The precipitate was filtered and washed with abundant MeOH. Orange solid, 77% yield.

<sup>1</sup>H-NMR (300 MHz, Chloroform-*d*): δ 7.87 (d, 2H), 7.55 (d, 2H), 4.56 (s, 4H).

#### B.7. (*E*)-1,2-bis(3-(bromomethyl)phenyl)diazene (**4b**)

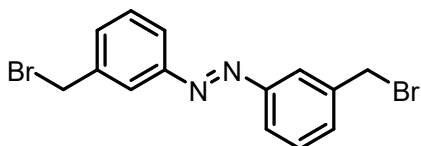

Synthesized following the same procedure as **4a**, starting from **3b**. Orange solid, yield 50%.

<sup>1</sup>H NMR (300 MHz, Chloroform-*d*): δ 7.95 (d, *J* = 1.6 Hz, 2H), 7.92 – 7.81 (m, 2H), 7.52 (dd, *J* = 4.8, 1.5 Hz, 4H), 4.59 (s, 4H).

#### B.8. (*E*)-1-(4-(bromomethyl)phenyl)-2-phenyldiazene (**4c**)

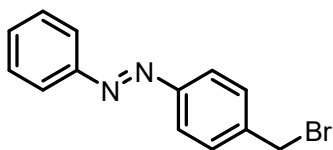

Synthesized following the same procedure as **4a**, starting from **3c**. Orange solid, yield 50%.

<sup>1</sup>H NMR (400 MHz, Chloroform-*d*): δ 7.95 – 7.85 (m, 4H), 7.58 – 7.45 (m, 5H), 4.56 (s, 2H).

#### B.9. (*E*)-1,1'-(diazene-1,2-diylbis(4,1-phenylene))bis(*N,N*-bis(pyridin-2-ylmethyl)methanamine) (**5a**)

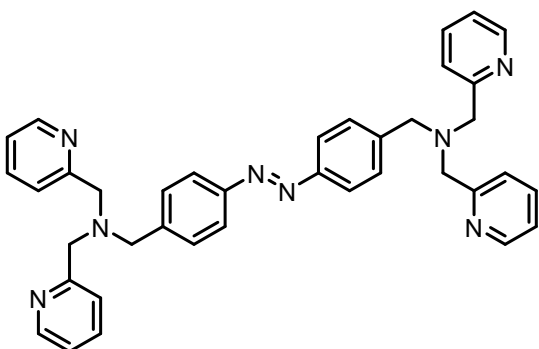

200 mg (1 mmol, 2 eq) of bis(pyridin-2-ylmethyl)amine were dissolved in a crimp capped vial in 8 ml dry DMF. Subsequently, 1 eq of (*E*)-1,2-bis(4-(bromomethyl)phenyl)diazene **4a**, 2 eq of sodium iodide and 2 eq of DIPEA were added. The reaction was stirred over weekend at room temperature. DMF was removed with rotary evaporator and the resulting orange oil was purified

by column chromatography (DCM:MeOH 9:1) to obtain an orange solid in 51% yield.

<sup>1</sup>H-NMR (400 MHz, Methanol-*d*<sub>4</sub>): δ 8.43 (dd, 4H), 7.83-7.79 (m, 8H), 7.69 (d, 4H), 7.58 (d, 4H), 7.29-7.26 (ddd, 4H), 3.81 (s, 8H), 3.76 (s, 4H).

<sup>13</sup>C-NMR (101 MHz, Methanol-*d*<sub>4</sub>): δ 159.0, 151.9, 148.0, 142.1, 137.4, 129.4, 123.5, 122.5, 122.4, 59.5, 58.1.

HRMS (ESI-MS): *m/z* calc. for [C<sub>38</sub>H<sub>38</sub>N<sub>8</sub>]<sup>2+</sup> [M<sub>2</sub>H]<sup>2+</sup> 303.1604, found 303.1612.

#### B.10. (*E*)-1,1'-(diazene-1,2-diylbis(3,1-phenylene))bis(*N,N*-bis(pyridin-2-ylmethyl)methanamine) (**5b**)

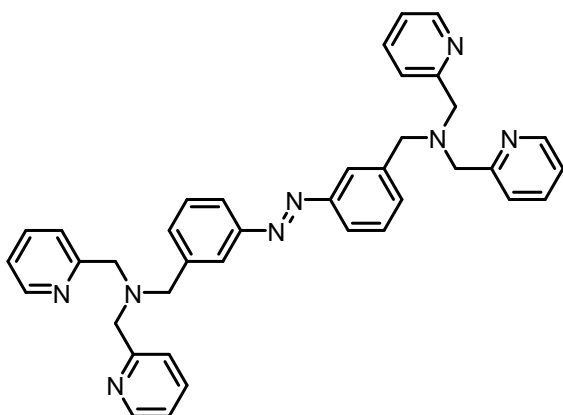

Synthesized following the same procedure as **5a**, starting from **4b**. Sticky orange oil, yield 80%.

<sup>1</sup>H NMR (400 MHz, Methanol-*d*<sub>4</sub>): δ 8.45 (ddd, *J* = 5.0, 1.6, 0.8 Hz, 4H), 7.95 (s, 2H), 7.86 – 7.78 (m, S-5

6H), 7.72 (d, J = 7.9 Hz, 4H), 7.59 (d, J = 7.6 Hz, 2H), 7.51 (t, J = 7.7 Hz, 2H), 7.28 (ddd, J = 7.4, 5.0, 1.1 Hz, 4H), 3.86 (s, 8H), 3.82 (s, 4H).

$^{13}\text{C}$  NMR (101 MHz, Methanol-*d*4):  $\delta$  159.0, 152.7, 148.1, 140.0, 137.4, 131.5, 128.9, 123.45, 122.8, 122.5, 121.5, 59.5, 58.2.

HRMS (ESI-TOF)  $m/z$  calculated for  $[\text{C}_{38}\text{H}_{38}\text{N}_8]^{2+}$   $[\text{M}2\text{H}]^{2+}$  303.1604, found 303.1613

### B.11. (*E*)-*N*-(4-(phenyldiazenyl)benzyl)-1-(pyridin-2-yl)-*N*-(pyridin-2-ylmethyl)methanamine (5c)

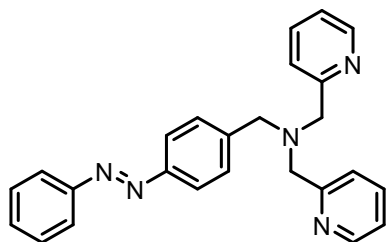

(5c)

Synthesized following the same procedure as **5a**, starting from **4c**. Sticky orange solid, yield 55%.

$^1\text{H}$  NMR (400 MHz, Methanol-*d*4):  $\delta$  8.44 (d, J = 5.0 Hz, 2H), 7.85 (dt, J = 22.5, 8.1 Hz, 6H), 7.70 (d, J = 7.8 Hz, 2H), 7.59 (d, J = 8.2 Hz, 2H), 7.56 – 7.46 (m, 3H), 7.33 – 7.24 (m, 2H), 3.82 (s, 4H), 3.76 (s, 2H).

$^{13}\text{C}$  NMR (101 MHz, Methanol-*d*4):  $\delta$  154.0, 153.2, 149.5, 143.6, 138.8, 132.2, 130.8, 130.3, 124.9, 123.9, 123.9, 123.8, 60.9, 59.5.

HRMS (ESI-TOF)  $m/z$  calculated for  $[\text{C}_{25}\text{H}_{24}\text{N}_5]^+$   $[\text{M}\text{H}]^+$  394.2026, found 394.2031

### B.12. [(*E*)-1,1'-(diazene-1,2-diylbis(4,1-phenylene))bis(*N,N*-bis(pyridin-2-ylmethyl)methanamine)][ $\text{CuCl}_2$ ]<sub>2</sub> (1a)

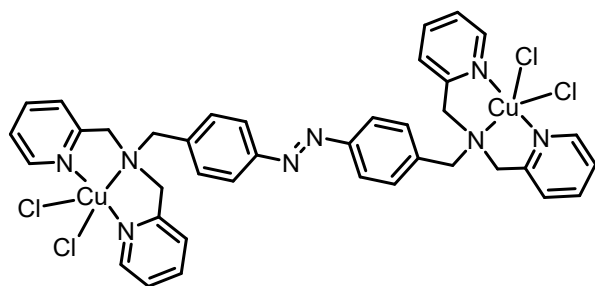

(*E*)-1,1'-(diazene-1,2-diylbis(4,1-phenylene))bis(*N,N*-bis(pyridin-2-ylmethyl)methanamine) **5a** was dissolved in the minimum amount of MeOH and  $\text{CuCl}_2$  dissolved in minimum amount of MeOH was added while stirring. The mixture immediately turned dark green and was left stirring for 24 hours at room

temperature, then filtered. A green solid was obtained, which was recrystallized with MeOH:diethyl ether. 92% yield.

### B.13. [(*E*)-1,1'-(diazene-1,2-diylbis(3,1-phenylene))bis(*N,N*-bis(pyridin-2-ylmethyl)methanamine)] [ $\text{CuCl}_2$ ]<sub>2</sub> (1b)

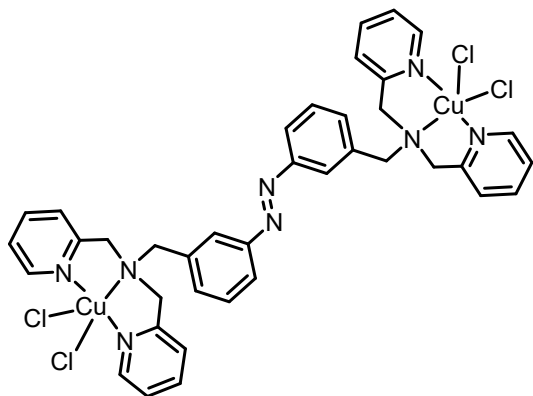

Synthesized following the same procedure as **1a**, starting from **5b**. Recrystallized with MeOH:diethyl ether. Green solid, 98% yield.

**B.14. [(*E*)-N-(4-(phenyldiazenyl)benzyl)-1-(pyridin-2-yl)-N-(pyridin-2-ylmethyl)methanamine] [CuCl<sub>2</sub>] (**1c**)**

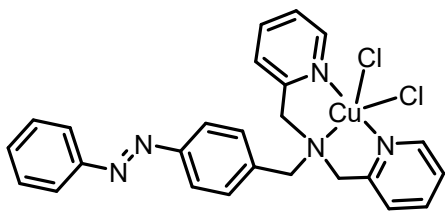

Synthesized following the same procedure as **1a**, starting from **5c**. Recrystallized with MeOH:diethyl ether. Dark green solid, 82% yield.

## C. Photophysical properties

### C.1. UV-vis spectra

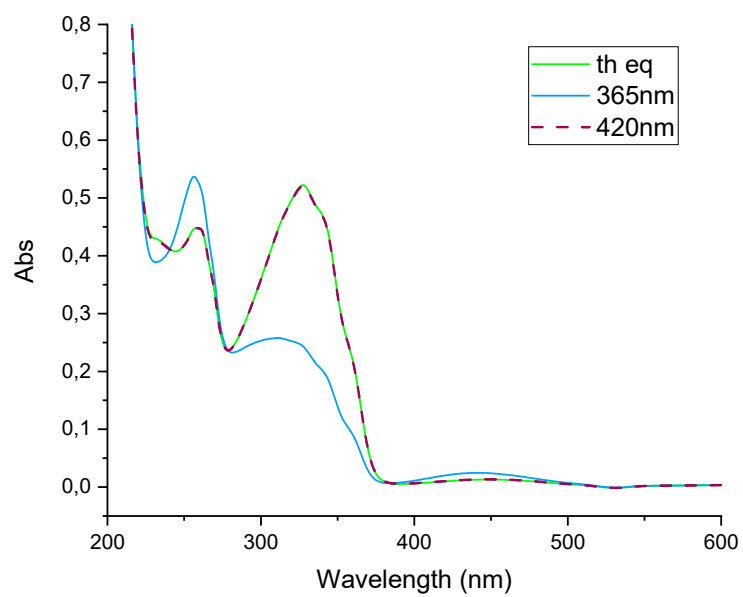

**Figure S- 1.** Absorption spectra of **1a** 25 μM in MeOH.

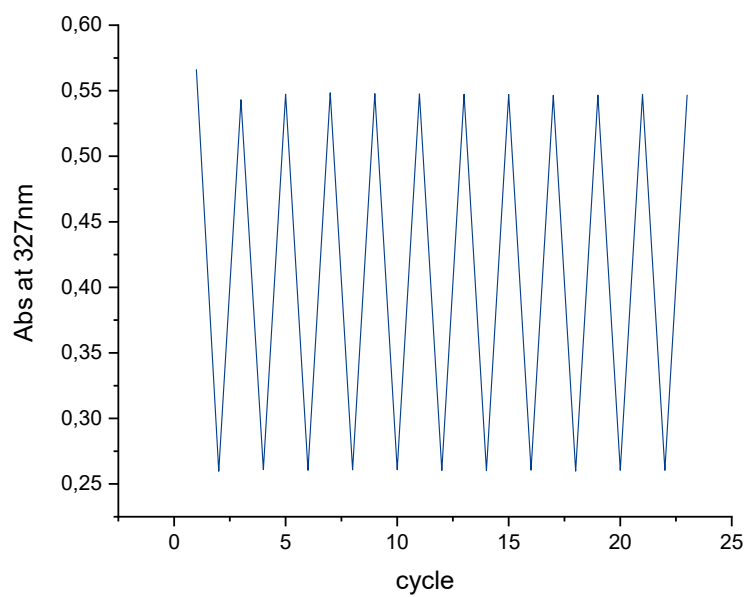

**Figure S- 2.** Fatigue resistance of **1a** 25 μM in MeOH.



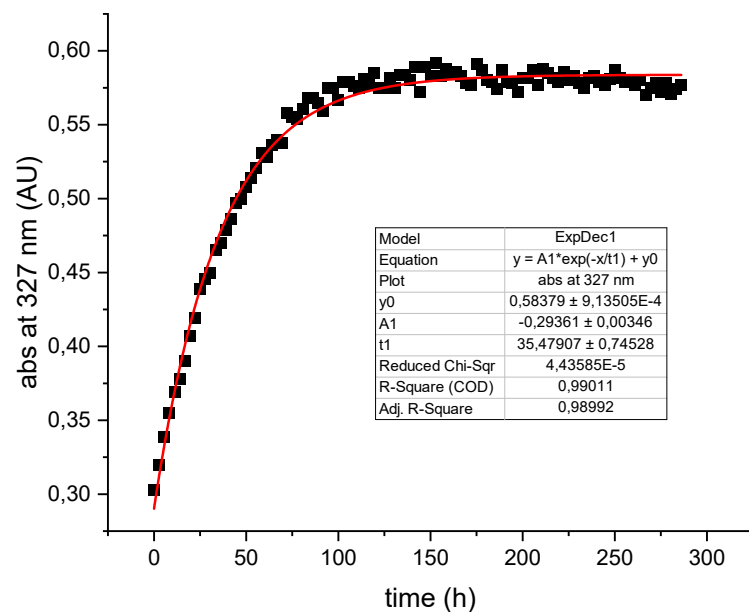

**Figure S- 3.** Thermal half life measurement of **1a** 25  $\mu$ M in MeOH after irradiation with 365 nm LED.

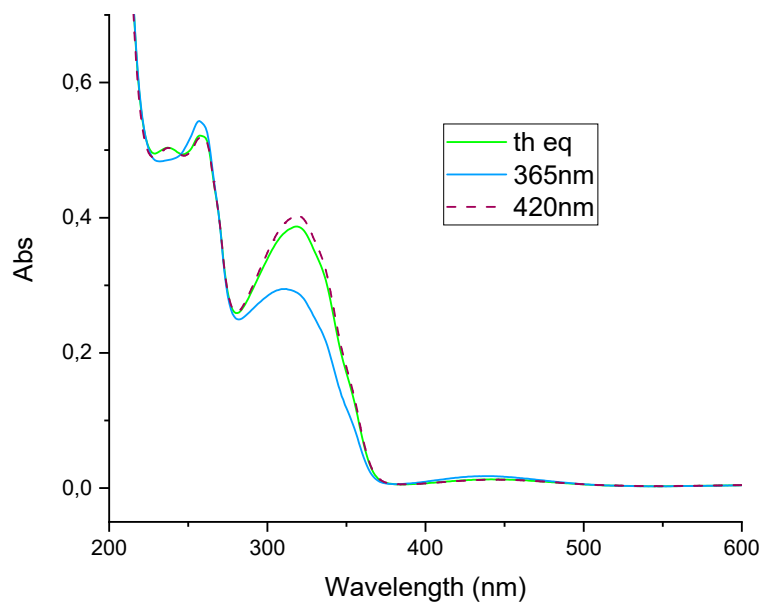

**Figure S- 4.** Absorption spectra of **1b** 25  $\mu$ M in MeOH.

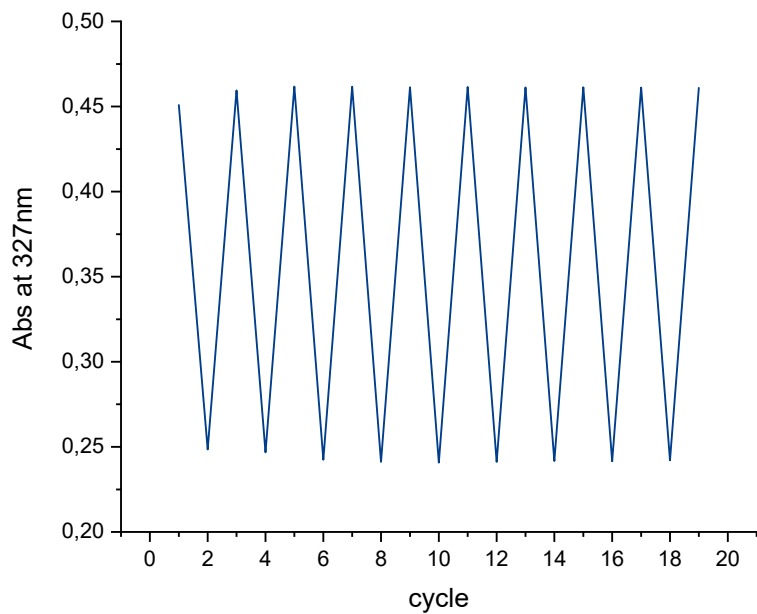

**Figure S- 5.** Fatigue resistance of **1b** 25  $\mu$ M in MeOH.

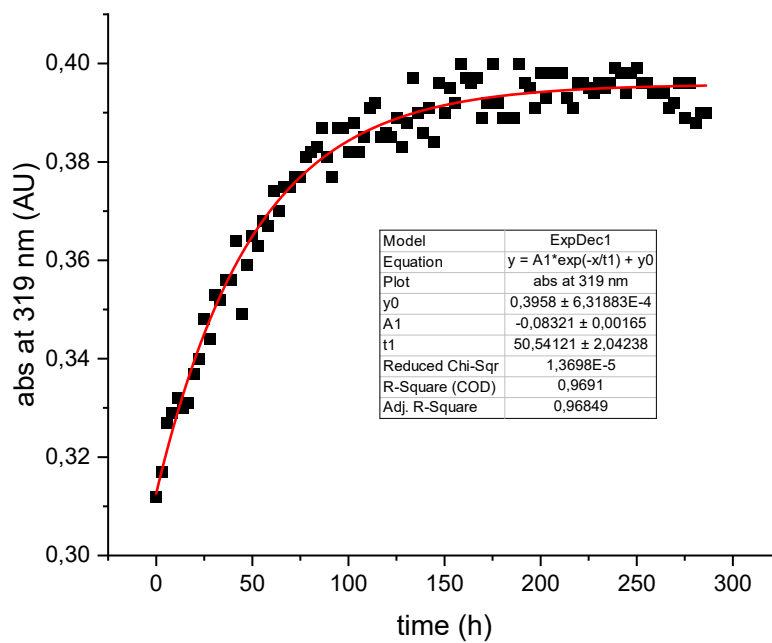

**Figure S- 6.** Thermal half life measurement of **1b** 25  $\mu$ M in MeOH after irradiation with 365 nm LED.

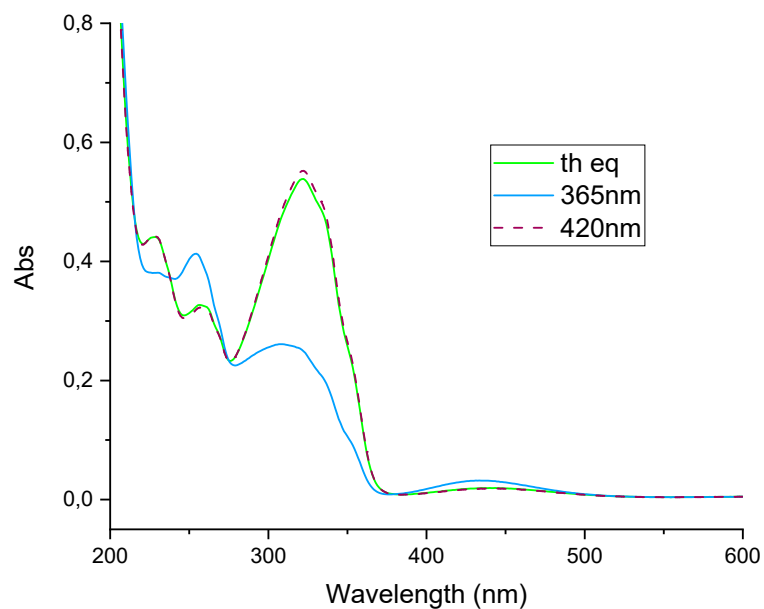

**Figure S- 7.** Absorption spectra of **1c** 25  $\mu$ M in MeOH.

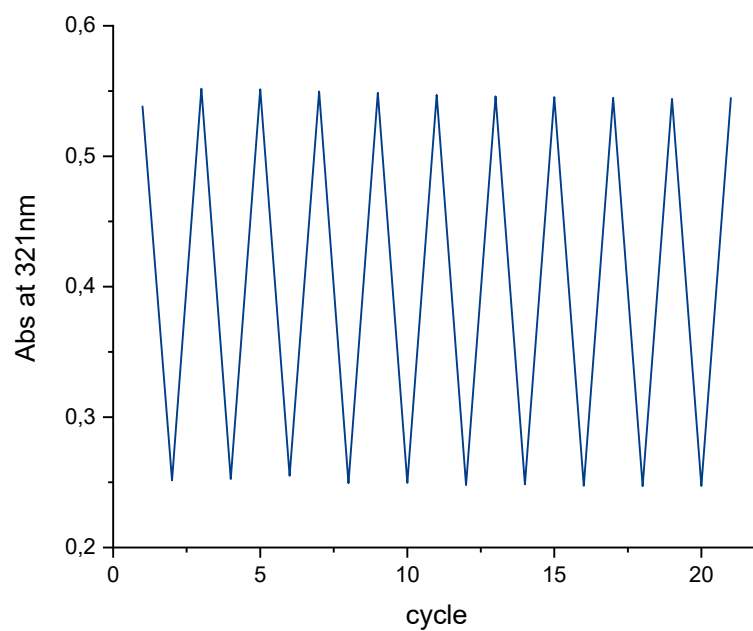

**Figure S- 8.** Fatigue resistance of **1c** 25  $\mu$ M in MeOH.

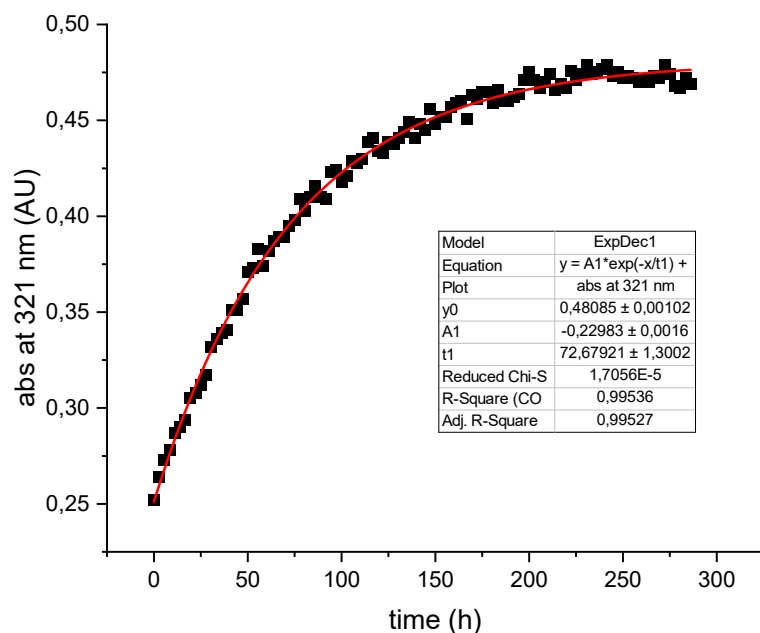

**Figure S- 9.** Thermal half life measurement of **1c** 25  $\mu$ M in MeOH after irradiation with 365 nm LED.

## C.2. Calculation of the PSD

For the calculation of the photostationary distribution (PSD) a reported method is used.<sup>5</sup> For **1a**: the spectrum at the thermal equilibrium is approximated to 100% of the *E*-isomer. The spectrum at the thermal equilibrium is fitted with four gaussian functions using the program OriginLab. The center of peak 3 is fixed for the fitting of the function at 365 nm. The ratio between the two areas gives an approximate PSD which is used to calculate the spectrum of pure *Z*. The spectra of the thermal equilibrium and 100% *Z* are then combined until they fit the experimental spectrum for 365 nm, giving the distribution of the two isomers. Similar procedures are used for **1b** and **1c**.

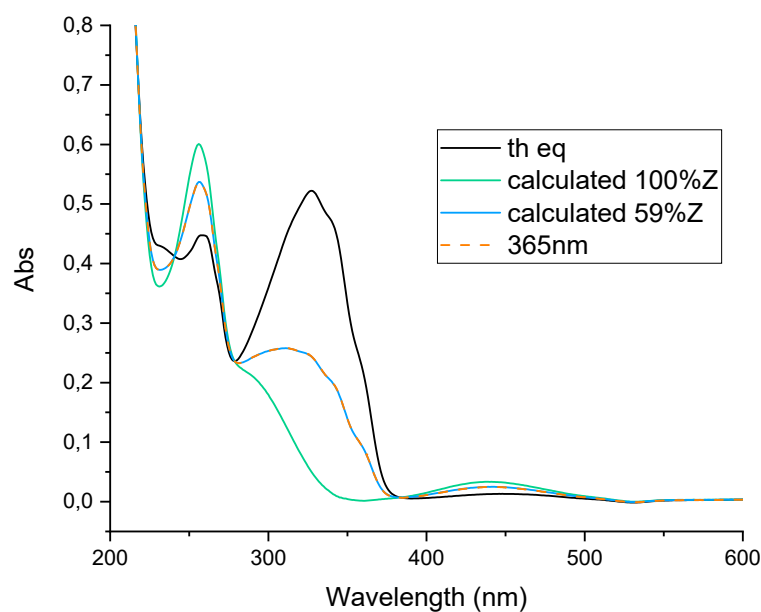

**Figure S- 10.** Simulated spectra and calculated PSD for **1a**.

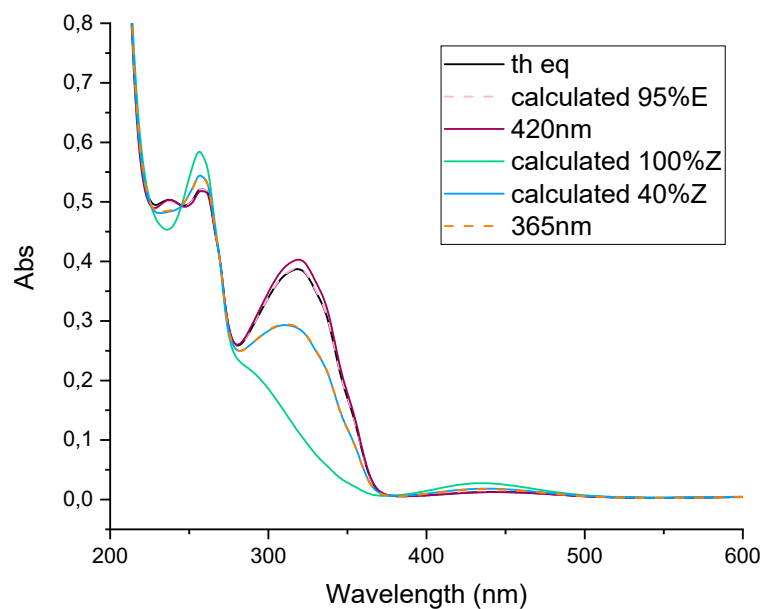

**Figure S- 11.** Simulated spectra and calculated PSD for **1b**.

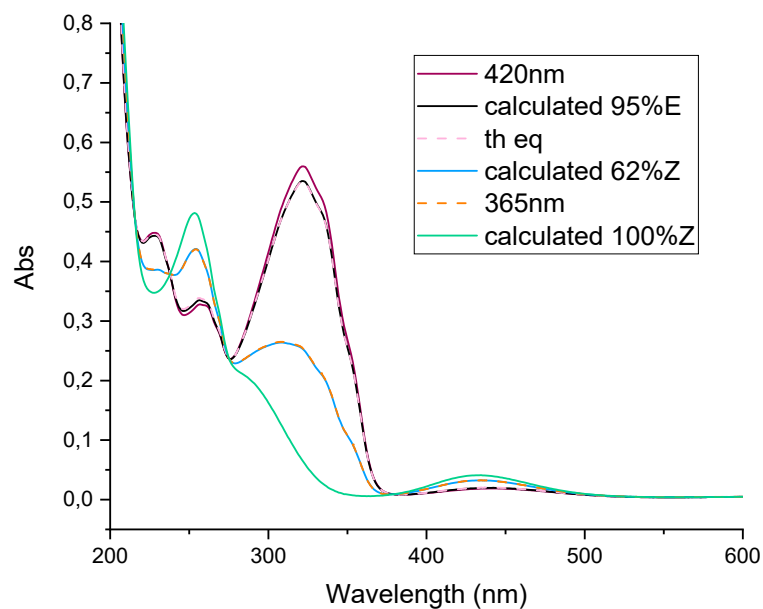

**Figure S- 12.** Simulated spectra and calculated PSD for **1c**.

**Table S- 1.** Photophysical properties of the photoswitchable complexes.

|           | $\lambda_{max} \pi\pi^*$<br><i>E</i> -isomer | $\epsilon [M^{-1}cm^{-1}]$<br><i>E</i> -isomer | $\lambda_{max} n\pi^*$<br><i>Z</i> -isomer | $\epsilon [M^{-1}cm^{-1}]$<br><i>Z</i> -isomer | PSD <i>th. eq.</i><br>( <i>E</i> : <i>Z</i> ) | PSD 365 nm<br>( <i>E</i> : <i>Z</i> ) | PSD 420 nm<br>( <i>E</i> : <i>Z</i> ) | $t_{1/2}$ (h)<br><i>Z</i> → <i>E</i> |
|-----------|----------------------------------------------|------------------------------------------------|--------------------------------------------|------------------------------------------------|-----------------------------------------------|---------------------------------------|---------------------------------------|--------------------------------------|
| <b>1a</b> | 327 nm                                       | 21100 ± 600                                    | 440 nm                                     | 990 ± 30                                       | 100:0                                         | 41:59                                 | 100:0                                 | 24.5                                 |
| <b>1b</b> | 319 nm                                       | 16600 ± 500                                    | 440 nm                                     | 750 ± 30                                       | 95:5                                          | 60:40                                 | 100:0                                 | 35.0                                 |
| <b>1c</b> | 321 nm                                       | 21100 ± 500                                    | 435 nm                                     | 1200 ± 30                                      | 95:5                                          | 39:61                                 | 100:0                                 | 50.3                                 |

## D. UV-vis kinetic experiments

### D.1. Experimental setup

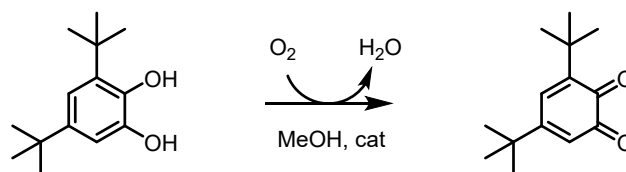

2 mL of catalyst solution (**1a** or **1b**) 10  $\mu$ M in MeOH saturated with O<sub>2</sub> is added in a gastight cuvette equipped with a stirring bar. For the experiments with the *Z*-isomer the cuvette is irradiated with a 365 nm LED for 30 seconds, while for the experiments with the *E*-isomer the cuvette is left in the dark. 20  $\mu$ L of a freshly made solution of di-*tert*-butylcatechol 1M in MeOH is added to the cuvette (to give a final concentration of 0.02M) and measurement is started immediately. In case of CuCl<sub>2</sub>, **E-1c** and **Z-1c** a double concentration is used. The formation of di-*tert*-butyl-quinone (DTBQ) is followed at 400 nm and the absorption of the catalysts at 400 nm is subtracted. The kinetic traces for all compounds are shown in **Figure S- 13**.

For the Michaelis-Menten study, the same procedure is used with increasing concentration of di-*tert*-butyl-catechol is used. The rate is calculated with the initial rates method and plotted against the initial concentration of di-*tert*-butyl-catechol. The plots for the *E*- and *Z*-configurations are shown in **Figure S- 15** and **Figure S- 16** and the values of K<sub>M</sub>, v<sub>max</sub>, k<sub>cat</sub>, TON (300 s) and k<sub>obs</sub> are reported in **Table S- 2**. k<sub>cat</sub> is calculated according to the equation

$$k_{cat} = \frac{v_{max}}{[E]}$$

Where v<sub>max</sub> is extrapolated from the Michaelis Menten plot and [E] is the enzyme concentration. k<sub>obs</sub> is extrapolated from the pseudo-first order approximation of the kinetic traces (shown in **Figure S- 14**).

### D.2. UV-vis kinetics

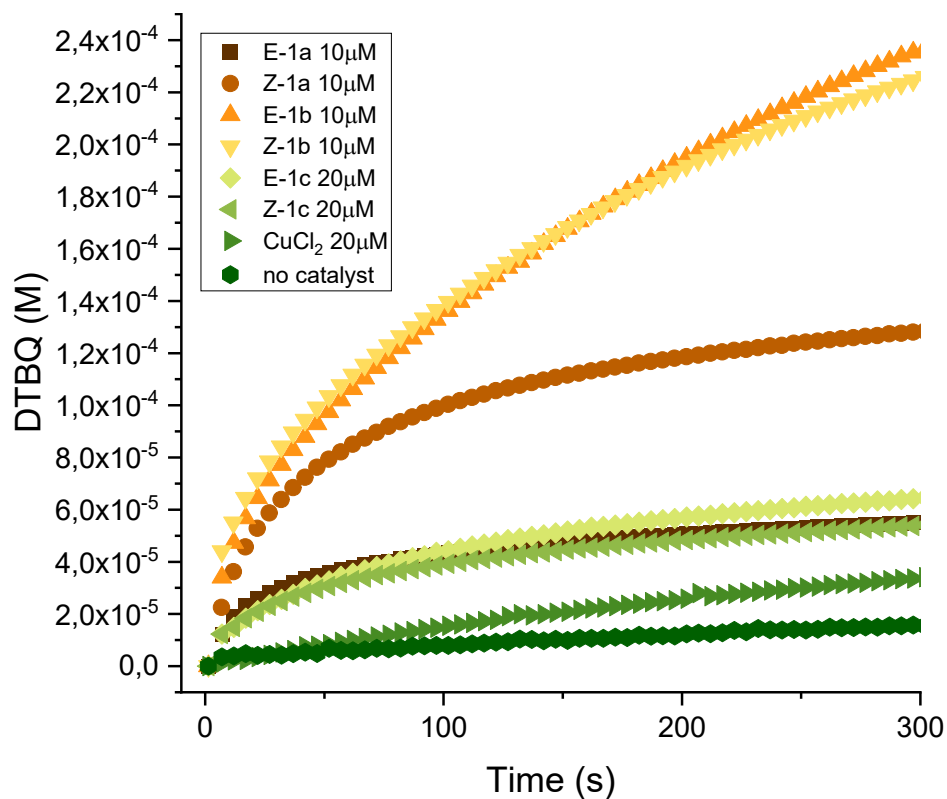

Figure S- 13: Comparison of the reaction kinetics of all the species studied.

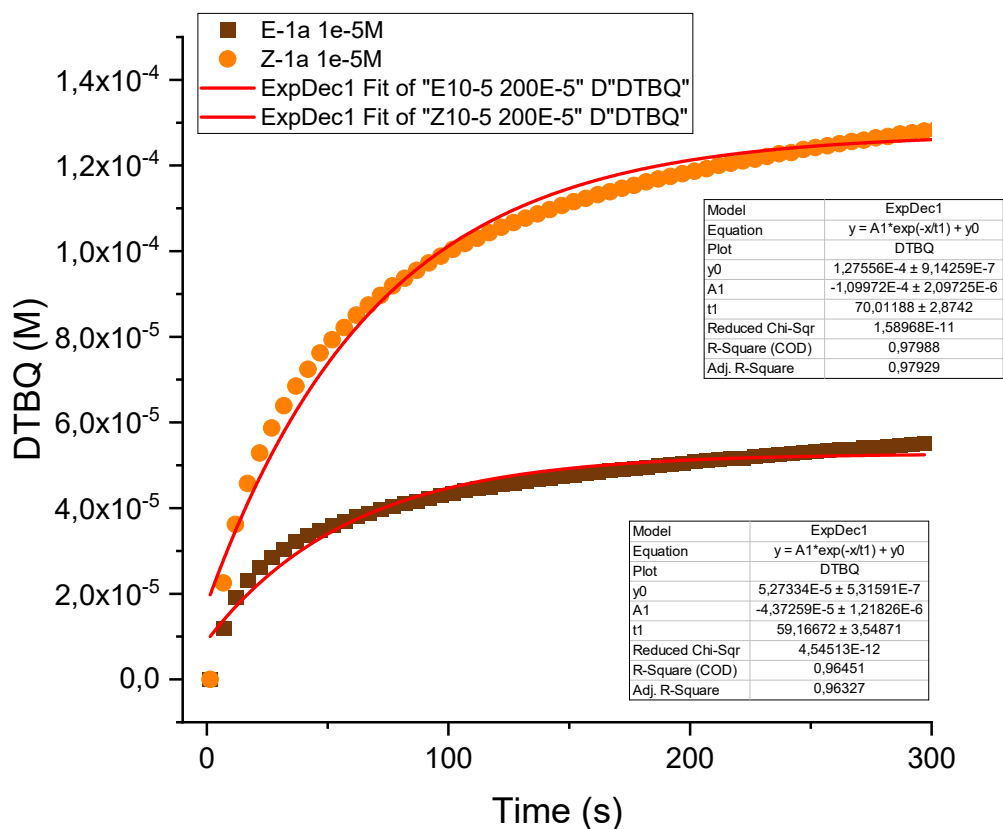

Figure S- 14: Highlighted kinetic traces of catalysts E-1a and Z-1a with pseudo-first order approximation.

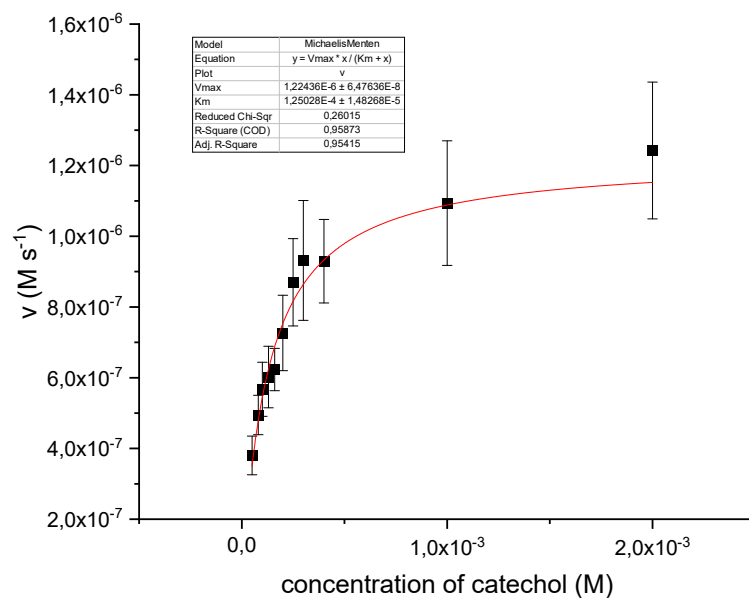

**Figure S- 15:** Michaelis-Menten plot for **E-1a**.

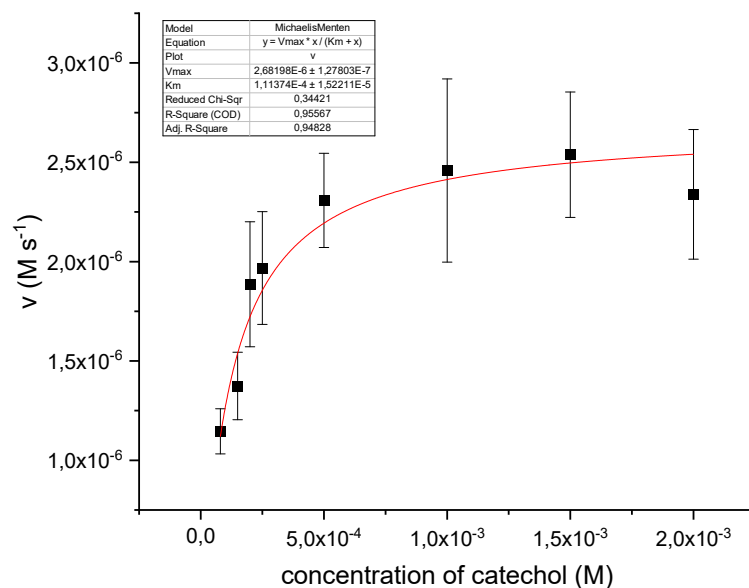

**Figure S- 16:** Michaelis-Menten plot for **Z-1a**.

**Table S- 2.** Kinetic constants for the switchable catalyst **1a**.

| catalyst    | $K_M$ (M)                | $v_{max}$ (M s <sup>-1</sup> ) | $k_{cat}$ (s <sup>-1</sup> ) | $k_{obs}$ (s <sup>-1</sup> ) | TON at 300 s |
|-------------|--------------------------|--------------------------------|------------------------------|------------------------------|--------------|
| <b>E-1a</b> | $1.25 \cdot 10^{-4} \pm$ | $1.22 \cdot 10^{-6} \pm$       | $1.22 \cdot 10^{-1} \pm$     | $1.69 \cdot 10^{-4} \pm$     | 5.5          |
|             | $0.15 \cdot 10^{-4}$     | $0.06 \cdot 10^{-6}$           | $0.06 \cdot 10^{-1}$         | $0.10 \cdot 10^{-4}$         |              |
| <b>Z-1a</b> | $1.11 \cdot 10^{-4} \pm$ | $2.68 \cdot 10^{-6} \pm$       | $2.68 \cdot 10^{-1} \pm$     | $1.43 \cdot 10^{-4} \pm$     | 12.8         |
|             | $0.15 \cdot 10^{-4}$     | $0.13 \cdot 10^{-6}$           | $0.13 \cdot 10^{-1}$         | $0.04 \cdot 10^{-4}$         |              |



## E. Crystallographic data

**Experimental.** Single clear green prism-shaped crystals of **E-1a** were used as supplied. A suitable crystal with dimensions  $0.23 \times 0.21 \times 0.12 \text{ mm}^3$  was selected and mounted on a MITIGEN holder with inert oil on a XtaLAB Synergy R, DW system, HyPix-Arc 150 diffractometer. The crystal was kept at a steady  $T = 123.01(10) \text{ K}$  during data collection. The structure was solved with the **ShelXT** 2018/2<sup>6</sup> solution program using dual methods and by using **Olex2** 1.3-alpha<sup>7</sup> as the graphical interface. The model was refined with **ShelXL** 2018/3<sup>8</sup> using full matrix least squares minimization on  $F^2$ .

**Crystal Data.**  $\text{C}_{38}\text{H}_{36}\text{Cl}_4\text{Cu}_2\text{N}_8$ ,  $M_r = 873.63$ , monoclinic,  $P2_1/c$  (No. 14),  $a = 9.44092(4) \text{ \AA}$ ,  $b = 11.74337(5) \text{ \AA}$ ,  $c = 22.12241(10) \text{ \AA}$ ,  $\beta = 100.1219(4)^\circ$ ,  $\alpha = \gamma = 90^\circ$ ,  $V = 2414.498(18) \text{ \AA}^3$ ,  $T = 123.01(10) \text{ K}$ ,  $Z = 2$ ,  $Z' = 0.5$ ,  $\mu(\text{Cu K}\alpha) = 3.373$ , 76090 reflections measured, 4956 unique ( $R_{\text{int}} = 0.0254$ ) which were used in all calculations. The final  $wR_2$  was 0.1033 (all data) and  $R_1$  was 0.0347 ( $I \geq 2 \sigma(I)$ ).

**Table S-3.** Crystal data and structure refinement for **E-1a**.

| Compound                              | <b>E-1a</b>                                                  |
|---------------------------------------|--------------------------------------------------------------|
| Formula                               | $\text{C}_{38}\text{H}_{36}\text{Cl}_4\text{Cu}_2\text{N}_8$ |
| $D_{\text{calc.}} / \text{g cm}^{-3}$ | 1.202                                                        |
| $\mu / \text{mm}^{-1}$                | 3.373                                                        |
| Formula Weight                        | 873.63                                                       |
| Colour                                | clear green                                                  |
| Shape                                 | prism-shaped                                                 |
| Size/ $\text{mm}^3$                   | $0.23 \times 0.21 \times 0.12$                               |
| T/K                                   | 123.01(10)                                                   |
| Crystal System                        | monoclinic                                                   |
| Space Group                           | $P2_1/c$                                                     |
| $a / \text{\AA}$                      | 9.44092(4)                                                   |
| $b / \text{\AA}$                      | 11.74337(5)                                                  |
| $c / \text{\AA}$                      | 22.12241(10)                                                 |
| $\alpha / ^\circ$                     | 90                                                           |
| $\beta / ^\circ$                      | 100.1219(4)                                                  |
| $\gamma / ^\circ$                     | 90                                                           |
| $V / \text{\AA}^3$                    | 2414.498(18)                                                 |
| Z                                     | 2                                                            |
| Z'                                    | 0.5                                                          |
| Wavelength/ $\text{\AA}$              | 1.54184                                                      |
| Radiation type                        | Cu $K_\alpha$                                                |
| $\Theta_{\text{min}} / ^\circ$        | 4.060                                                        |
| $\Theta_{\text{max}} / ^\circ$        | 74.994                                                       |
| Measured Refl's.                      | 76090                                                        |
| Indep't Refl's                        | 4956                                                         |
| Refl's $I \geq 2 \sigma(I)$           | 4851                                                         |
| $R_{\text{int}}$                      | 0.0254                                                       |
| Parameters                            | 275                                                          |
| Restraints                            | 0                                                            |
| Largest Peak                          | 0.955                                                        |
| Deepest Hole                          | -0.395                                                       |
| GooF                                  | 1.156                                                        |
| $wR_2$ (all data)                     | 0.1033                                                       |
| $wR_2$                                | 0.1030                                                       |
| $R_1$ (all data)                      | 0.0351                                                       |
| $R_1$                                 | 0.0347                                                       |

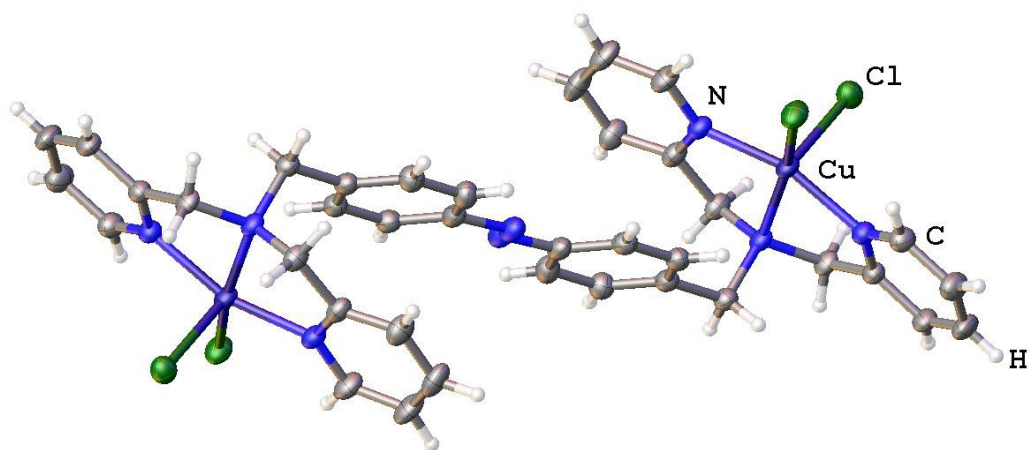

**Figure S- 17.** Crystal structure of **E-1a**.

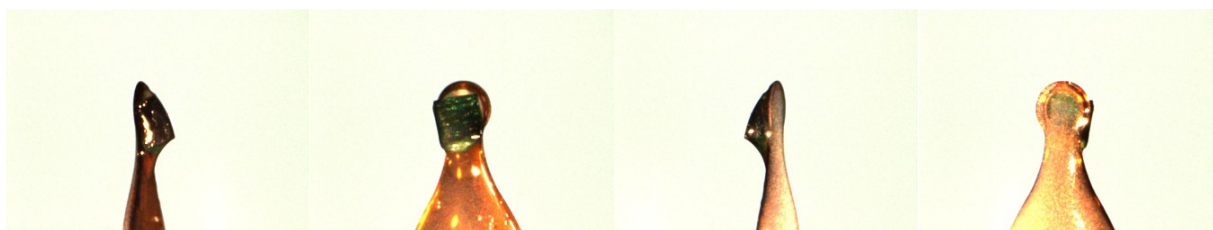

**Figure S- 18.** Images of the crystal on the diffractometer.

**Table S- 4.** Fractional Atomic Coordinates ( $\times 10^4$ ) and Equivalent Isotropic Displacement Parameters ( $\text{\AA}^2 \times 10^3$ ) for **E-1a**.  $U_{eq}$  is defined as 1/3 of the trace of the orthogonalised  $U_{ij}$ .

| Atom | x          | y          | z          | $U_{eq}$  |
|------|------------|------------|------------|-----------|
| Cu01 | 5692.8(3)  | 4117.2(2)  | 6972.8(2)  | 24.81(10) |
| Cl02 | 5148.6(5)  | 4451.1(4)  | 8043.2(2)  | 32.60(12) |
| Cl03 | 7152.1(5)  | 2583.1(4)  | 7034.4(2)  | 34.43(13) |
| N004 | 4479.1(15) | 5469.0(13) | 6578.1(7)  | 23.7(3)   |
| N005 | 3824.6(16) | 3301.5(13) | 6649.4(7)  | 26.0(3)   |
| N006 | 7237.1(15) | 5306.8(14) | 7110.7(7)  | 26.9(3)   |
| C008 | 6749.4(19) | 6373.6(17) | 7028.2(8)  | 28.0(4)   |
| C009 | 5138(2)    | 6509.0(16) | 6886.0(9)  | 28.2(4)   |
| C00A | 5823.6(19) | 5527.3(17) | 5692.4(8)  | 27.1(4)   |
| C00B | 2677.2(19) | 4006.3(16) | 6567.4(8)  | 26.3(4)   |
| C00C | 4385.0(19) | 5554.3(16) | 5895.5(8)  | 27.2(4)   |
| C00D | 3015.3(18) | 5238.3(16) | 6709.4(9)  | 26.6(4)   |
| C00E | 7821(2)    | 4428.7(17) | 5453.2(8)  | 29.2(4)   |
| C00F | 8456.8(19) | 5434.8(18) | 5295.4(8)  | 30.6(4)   |
| C00G | 1294(2)    | 3601.4(19) | 6363.7(9)  | 31.8(4)   |
| C00H | 6516(2)    | 4483.2(17) | 5650.1(8)  | 28.7(4)   |
| C00I | 3634(2)    | 2194.3(17) | 6522.0(9)  | 31.8(4)   |
| C00J | 7791(2)    | 6480.3(19) | 5339.4(9)  | 33.9(4)   |
| C00K | 8667(2)    | 5127.1(19) | 7264.9(10) | 33.9(4)   |
| C00L | 7675(2)    | 7301.6(19) | 7085.6(10) | 35.5(4)   |
| C00M | 1096(2)    | 2460(2)    | 6233.2(11) | 39.8(5)   |
| C00N | 6467(2)    | 6521.8(18) | 5533.3(9)  | 32.0(4)   |
| C00O | 9141(2)    | 7109(2)    | 7243.9(11) | 40.9(5)   |
| C00P | 2279(2)    | 1741.4(19) | 6310.0(11) | 39.5(5)   |
| C00Q | 9640(2)    | 6009(2)    | 7340.7(11) | 39.5(5)   |
| N1   | 9791.5(17) | 5474.2(16) | 5073.8(7)  | 33.8(4)   |

**Table S- 5.** Anisotropic Displacement Parameters ( $\times 10^4$ ) for **E-1a**. The anisotropic displacement factor exponent takes the form:  $-2\pi^2[h^2a^{*2} \times U_{11} + \dots + 2hka^* \times b^* \times U_{12}]$ .

| Atom | $U_{11}$  | $U_{22}$  | $U_{33}$  | $U_{23}$  | $U_{13}$ | $U_{12}$  |
|------|-----------|-----------|-----------|-----------|----------|-----------|
| Cu01 | 15.47(15) | 28.41(17) | 29.69(16) | 1.13(10)  | 1.6(1)   | 0.83(9)   |
| Cl02 | 35.1(2)   | 31.3(2)   | 31.8(2)   | -0.50(17) | 6.72(18) | -2.09(17) |
| Cl03 | 21.8(2)   | 31.4(2)   | 49.1(3)   | 4.56(19)  | 3.51(18) | 5.21(16)  |
| N004 | 15.2(7)   | 28.2(7)   | 27.8(7)   | -1.2(6)   | 3.5(5)   | 0.1(5)    |
| N005 | 19.4(7)   | 31.1(8)   | 27.1(7)   | 2.5(6)    | 2.8(5)   | 0.3(6)    |
| N006 | 17.6(7)   | 34.0(8)   | 28.5(7)   | -2.1(6)   | 2.4(6)   | -0.7(6)   |
| C008 | 20.3(8)   | 34.3(10)  | 29.4(9)   | -5.7(7)   | 4.1(7)   | -3.6(7)   |
| C009 | 22.4(9)   | 26.2(9)   | 35.6(9)   | -5.0(7)   | 3.9(7)   | -0.6(7)   |
| C00A | 21.4(8)   | 36.3(10)  | 23.2(8)   | 1.1(7)    | 2.5(6)   | -0.6(7)   |
| C00B | 20.2(8)   | 32.6(10)  | 25.9(8)   | 3.8(7)    | 3.0(7)   | -0.9(7)   |
| C00C | 20.8(8)   | 33.0(9)   | 26.9(9)   | 2.5(7)    | 2.1(7)   | 0.3(7)    |
| C00D | 15.0(7)   | 32.1(9)   | 33.1(9)   | -1.2(7)   | 5.8(6)   | 1.6(7)    |
| C00E | 24.1(9)   | 37.6(10)  | 25.3(8)   | 2.1(7)    | 2.6(7)   | 1.6(7)    |
| C00F | 21.0(8)   | 46.4(11)  | 24.3(8)   | 0.8(8)    | 3.3(7)   | -3.9(8)   |
| C00G | 18.8(8)   | 41.0(11)  | 34.0(9)   | 6.6(8)    | 0.6(7)   | -0.8(8)   |
| C00H | 24.5(9)   | 36.1(10)  | 25.0(8)   | 2.2(7)    | 3.0(7)   | -2.0(7)   |
| C00I | 28.8(10)  | 31.0(10)  | 34.3(9)   | 3.1(8)    | 1.7(7)   | -0.9(8)   |
| C00J | 30.4(10)  | 39.3(11)  | 32.9(9)   | 0.1(8)    | 8.3(8)   | -6.7(8)   |
| C00K | 18.5(8)   | 40.6(11)  | 41.8(11)  | -4.1(9)   | 2.9(7)   | 1.1(8)    |
| C00L | 29.0(10)  | 31.2(11)  | 46.5(11)  | -8.8(9)   | 6.6(8)   | -3.1(8)   |
| C00M | 25.0(10)  | 44.4(12)  | 45.7(12)  | 7.4(9)    | -6.2(8)  | -10.8(8)  |
| C00N | 29.7(9)   | 34.4(10)  | 32.4(9)   | 1.0(8)    | 6.6(7)   | -0.9(8)   |
| C00O | 26.1(10)  | 44.4(12)  | 52.6(12)  | -15.2(10) | 8.4(9)   | -12.4(9)  |
| C00P | 36.4(11)  | 31.8(11)  | 46.8(12)  | 3.4(9)    | -2.0(9)  | -7.1(9)   |
| C00Q | 18.1(9)   | 49.7(12)  | 50.0(12)  | -11.4(10) | 4.5(8)   | -3.2(8)   |
| N1   | 23.0(8)   | 50.4(10)  | 28.3(8)   | 0.1(7)    | 5.7(6)   | -3.9(7)   |

**Table S- 6.** Bond Lengths in Å for E-1a.

| Atom | Atom | Length/Å   | Atom                     | Atom            | Length/Å |
|------|------|------------|--------------------------|-----------------|----------|
| Cu01 | Cl02 | 2.5402(5)  | C00O                     | C00Q            | 1.379(3) |
| Cu01 | Cl03 | 2.2575(5)  | N1                       | N1 <sup>1</sup> | 1.244(4) |
| Cu01 | N004 | 2.0601(15) | <sup>1</sup> 2-x,1-y,1-z |                 |          |
| Cu01 | N005 | 2.0241(15) |                          |                 |          |
| Cu01 | N006 | 2.0035(16) |                          |                 |          |
| N004 | C009 | 1.481(2)   |                          |                 |          |
| N004 | C00C | 1.501(2)   |                          |                 |          |
| N004 | C00D | 1.486(2)   |                          |                 |          |
| N005 | C00B | 1.350(2)   |                          |                 |          |
| N005 | C00I | 1.336(3)   |                          |                 |          |
| N006 | C008 | 1.336(3)   |                          |                 |          |
| N006 | C00K | 1.349(2)   |                          |                 |          |
| C008 | C009 | 1.507(2)   |                          |                 |          |
| C008 | C00L | 1.389(3)   |                          |                 |          |
| C00A | C00C | 1.504(2)   |                          |                 |          |
| C00A | C00H | 1.400(3)   |                          |                 |          |
| C00A | C00N | 1.390(3)   |                          |                 |          |
| C00B | C00D | 1.503(3)   |                          |                 |          |
| C00B | C00G | 1.389(3)   |                          |                 |          |
| C00E | C00F | 1.397(3)   |                          |                 |          |
| C00E | C00H | 1.379(3)   |                          |                 |          |
| C00F | C00J | 1.391(3)   |                          |                 |          |
| C00F | N1   | 1.431(2)   |                          |                 |          |
| C00G | C00M | 1.377(3)   |                          |                 |          |
| C00I | C00P | 1.388(3)   |                          |                 |          |
| C00J | C00N | 1.392(3)   |                          |                 |          |
| C00K | C00Q | 1.374(3)   |                          |                 |          |
| C00L | C00O | 1.385(3)   |                          |                 |          |
| C00M | C00P | 1.386(3)   |                          |                 |          |

**Table S- 7.** Bond Angles in ° for **E-1a**.

| Atom | Atom | Atom | Angle/°     | Atom            | Atom | Atom | Angle/°    |
|------|------|------|-------------|-----------------|------|------|------------|
| Cl03 | Cu01 | Cl02 | 106.752(19) | C00H            | C00A | C00C | 119.66(17) |
| N004 | Cu01 | Cl02 | 95.03(4)    | C00N            | C00A | C00C | 121.03(17) |
| N004 | Cu01 | Cl03 | 158.22(4)   | C00N            | C00A | C00H | 119.29(17) |
| N005 | Cu01 | Cl02 | 95.52(4)    | N005            | C00B | C00D | 115.23(15) |
| N005 | Cu01 | Cl03 | 97.37(5)    | N005            | C00B | C00G | 121.36(18) |
| N005 | Cu01 | N004 | 80.19(6)    | C00G            | C00B | C00D | 123.41(17) |
| N006 | Cu01 | Cl02 | 90.66(5)    | N004            | C00C | C00A | 113.73(14) |
| N006 | Cu01 | Cl03 | 97.31(5)    | N004            | C00D | C00B | 107.78(14) |
| N006 | Cu01 | N004 | 82.12(6)    | C00H            | C00E | C00F | 119.12(18) |
| N006 | Cu01 | N005 | 161.70(6)   | C00E            | C00F | N1   | 123.77(19) |
| C009 | N004 | Cu01 | 106.44(11)  | C00J            | C00F | C00E | 120.66(17) |
| C009 | N004 | C00C | 110.71(14)  | C00J            | C00F | N1   | 115.57(18) |
| C009 | N004 | C00D | 112.99(14)  | C00M            | C00G | C00B | 119.11(19) |
| C00C | N004 | Cu01 | 114.09(11)  | C00E            | C00H | C00A | 121.01(18) |
| C00D | N004 | Cu01 | 104.11(11)  | N005            | C00I | C00P | 121.74(19) |
| C00D | N004 | C00C | 108.43(13)  | C00F            | C00J | C00N | 119.61(19) |
| C00B | N005 | Cu01 | 112.71(12)  | N006            | C00K | C00Q | 122.0(2)   |
| C00I | N005 | Cu01 | 127.73(13)  | C00O            | C00L | C008 | 118.7(2)   |
| C00I | N005 | C00B | 119.55(16)  | C00G            | C00M | C00P | 119.34(19) |
| C008 | N006 | Cu01 | 114.14(12)  | C00A            | C00N | C00J | 120.30(19) |
| C008 | N006 | C00K | 119.11(17)  | C00Q            | C00O | C00L | 119.4(2)   |
| C00K | N006 | Cu01 | 126.75(14)  | C00M            | C00P | C00I | 118.9(2)   |
| N006 | C008 | C009 | 116.01(16)  | C00K            | C00Q | C00O | 118.97(19) |
| N006 | C008 | C00L | 121.80(18)  | N1 <sup>1</sup> | N1   | C00F | 113.5(2)   |
| C00L | C008 | C009 | 122.17(18)  |                 |      |      |            |
| N004 | C009 | C008 | 109.64(15)  |                 |      |      |            |

<sup>1</sup>2-x,1-y,1-z**Table S- 8.** Torsion Angles in ° for **E-1a**.

| Atom | Atom | Atom | Atom | Angle/°     |
|------|------|------|------|-------------|
| Cu01 | N004 | C009 | C008 | 35.98(17)   |
| Cu01 | N004 | C00C | C00A | -51.69(18)  |
| Cu01 | N004 | C00D | C00B | -45.63(15)  |
| Cu01 | N005 | C00B | C00D | 1.95(19)    |
| Cu01 | N005 | C00B | C00G | -178.27(14) |
| Cu01 | N005 | C00I | C00P | 178.98(15)  |
| Cu01 | N006 | C008 | C009 | 3.6(2)      |
| Cu01 | N006 | C008 | C00L | -177.92(15) |
| Cu01 | N006 | C00K | C00Q | 179.10(16)  |
| N005 | C00B | C00D | N004 | 30.3(2)     |
| N005 | C00B | C00G | C00M | -1.1(3)     |
| N005 | C00I | C00P | C00M | -0.4(3)     |
| N006 | C008 | C009 | N004 | -27.5(2)    |
| N006 | C008 | C00L | C00O | -1.2(3)     |
| N006 | C00K | C00Q | C00O | -1.4(3)     |
| C008 | N006 | C00K | C00Q | 0.1(3)      |
| C008 | C00L | C00O | C00Q | -0.1(3)     |
| C009 | N004 | C00C | C00A | 68.34(19)   |
| C009 | N004 | C00D | C00B | -160.69(15) |
| C009 | C008 | C00L | C00O | 177.17(19)  |
| C00B | N005 | C00I | C00P | -0.4(3)     |
| C00B | C00G | C00M | C00P | 0.2(3)      |
| C00C | N004 | C009 | C008 | -88.53(18)  |
| C00C | N004 | C00D | C00B | 76.20(17)   |

| Atom | Atom | Atom | Atom            | Angle/°     |
|------|------|------|-----------------|-------------|
| C00C | C00A | C00H | C00E            | 178.65(16)  |
| C00C | C00A | C00N | C00J            | -179.24(17) |
| C00D | N004 | C009 | C008            | 149.63(15)  |
| C00D | N004 | C00C | C00A            | -167.19(15) |
| C00D | C00B | C00G | C00M            | 178.64(19)  |
| C00E | C00F | C00J | C00N            | -1.0(3)     |
| C00E | C00F | N1   | N1 <sup>1</sup> | 12.5(3)     |
| C00F | C00E | C00H | C00A            | 0.1(3)      |
| C00F | C00J | C00N | C00A            | 1.1(3)      |
| C00G | C00B | C00D | N004            | -149.49(17) |
| C00G | C00M | C00P | C00I            | 0.5(3)      |
| C00H | C00A | C00C | N004            | 80.1(2)     |
| C00H | C00A | C00N | C00J            | -0.6(3)     |
| C00H | C00E | C00F | C00J            | 0.4(3)      |
| C00H | C00E | C00F | N1              | -178.65(17) |
| C00I | N005 | C00B | C00D            | -178.55(16) |
| C00I | N005 | C00B | C00G            | 1.2(3)      |
| C00J | C00F | N1   | N1 <sup>1</sup> | -166.6(2)   |
| C00K | N006 | C008 | C009            | -177.24(17) |
| C00K | N006 | C008 | C00L            | 1.2(3)      |
| C00L | C008 | C009 | N004            | 154.06(18)  |
| C00L | C00O | C00Q | C00K            | 1.3(3)      |
| C00N | C00A | C00C | N004            | -101.2(2)   |
| C00N | C00A | C00H | C00E            | 0.0(3)      |
| N1   | C00F | C00J | C00N            | 178.12(17)  |

<sup>1</sup>2-x,1-y,1-z

**Table S- 9.** Hydrogen Fractional Atomic Coordinates ( $\times 10^4$ ) and Equivalent Isotropic Displacement Parameters ( $\text{\AA}^2 \times 10^3$ ) for **E-1a**.  $U_{eq}$  is defined as 1/3 of the trace of the orthogonalised  $U_{ij}$ .

| Atom | x        | y        | z        | $U_{eq}$ |
|------|----------|----------|----------|----------|
| H00C | 3888.74  | 6272.41  | 5751.07  | 33       |
| H00D | 3792.02  | 4916     | 5697.98  | 33       |
| H00E | 2300.26  | 5731.32  | 6451.95  | 32       |
| H00F | 2984.04  | 5397.76  | 7146.25  | 32       |
| H00G | 8282.41  | 3716.38  | 5425.22  | 35       |
| H00I | 6079.06  | 3801.96  | 5758.76  | 34       |
| H00P | 9797.48  | 7728.94  | 7285.32  | 49       |
| H00R | 10639.74 | 5861.93  | 7458     | 47       |
| H00A | 4920(20) | 7179(18) | 6649(9)  | 19(5)    |
| H00O | 6030(20) | 7300(20) | 5545(10) | 27(5)    |
| H00K | 8180(20) | 7110(20) | 5227(10) | 26(5)    |
| H00B | 4760(30) | 6620(20) | 7274(13) | 43(7)    |
| H00M | 7320(30) | 7910(20) | 7027(11) | 33(6)    |
| H00J | 4500(30) | 1730(20) | 6595(11) | 31(6)    |
| H00Q | 2260(30) | 970(20)  | 6245(12) | 41(7)    |
| H00L | 8950(30) | 4330(20) | 7319(12) | 42(7)    |
| H00N | 250(30)  | 2230(30) | 6113(13) | 56(8)    |
| H00H | 630(30)  | 4110(20) | 6333(12) | 36(6)    |

**Table S- 10.** Solvent masking (PLATON/SQUEEZE) information for **E-1a**.

| No | x      | y     | z     | V     | e    | Content |
|----|--------|-------|-------|-------|------|---------|
| 1  | -0.976 | 0.000 | 0.500 | 395.2 | 87.7 | 2et2o   |
| 2  | -0.923 | 0.500 | 0.000 | 395.2 | 87.7 | 2et2o   |

# F. NMR spectra

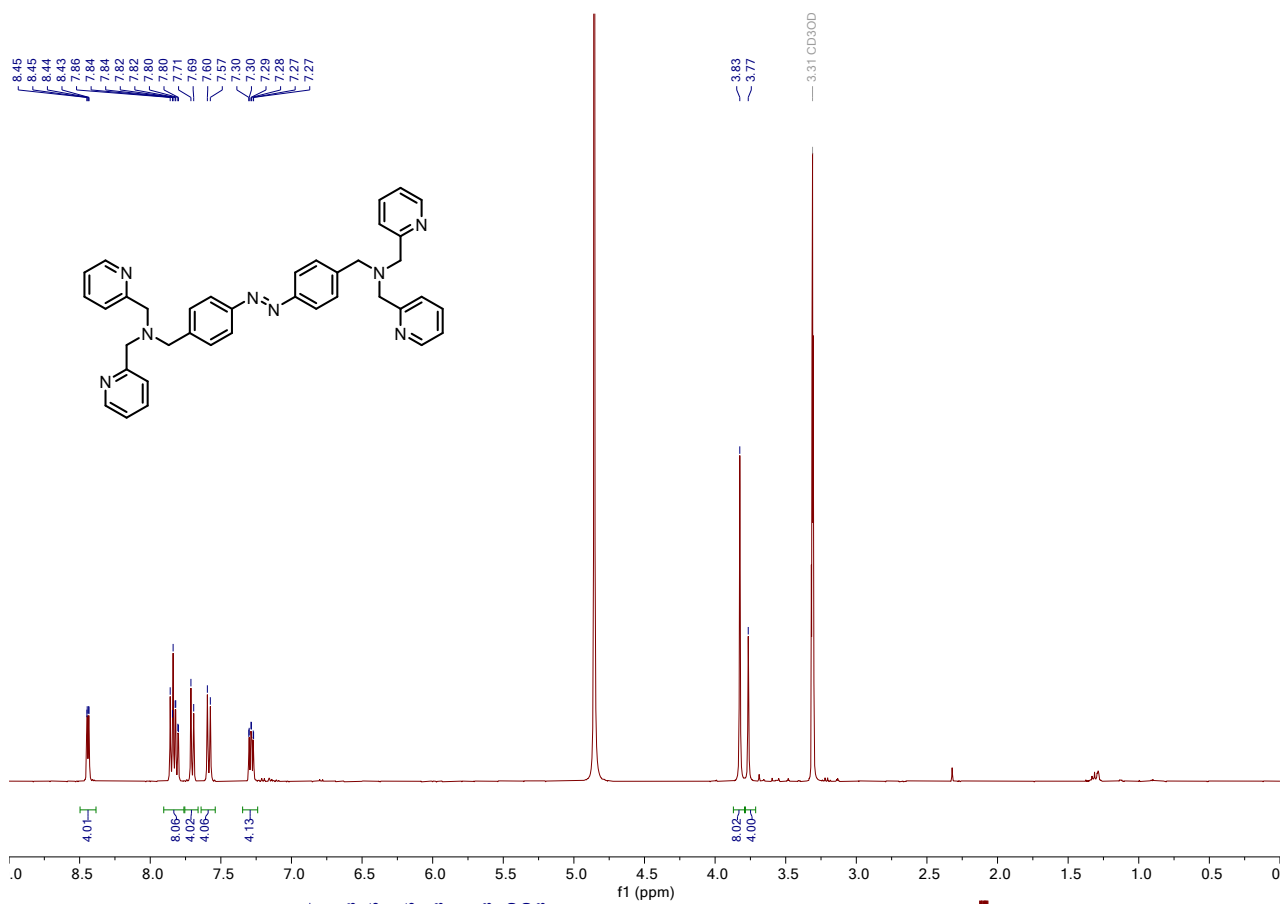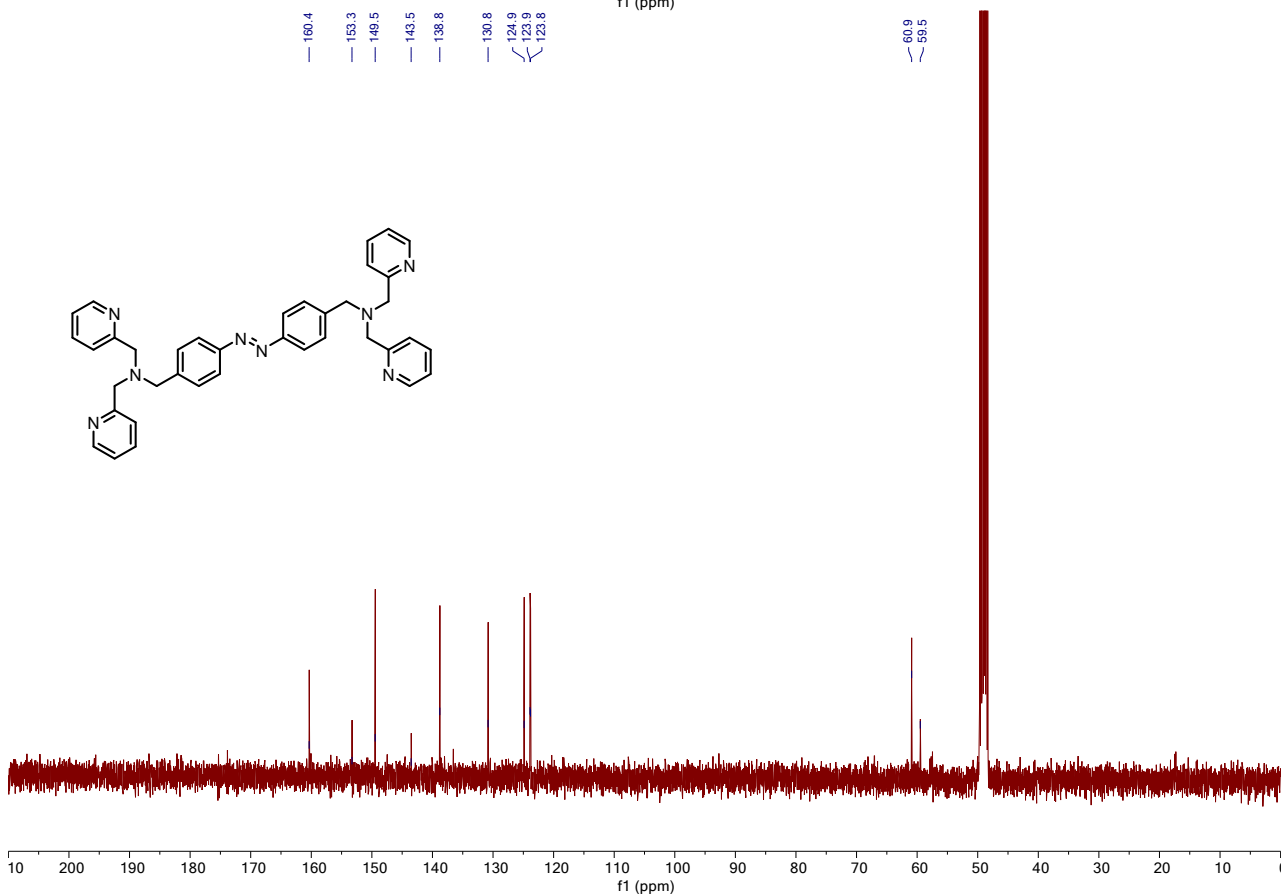

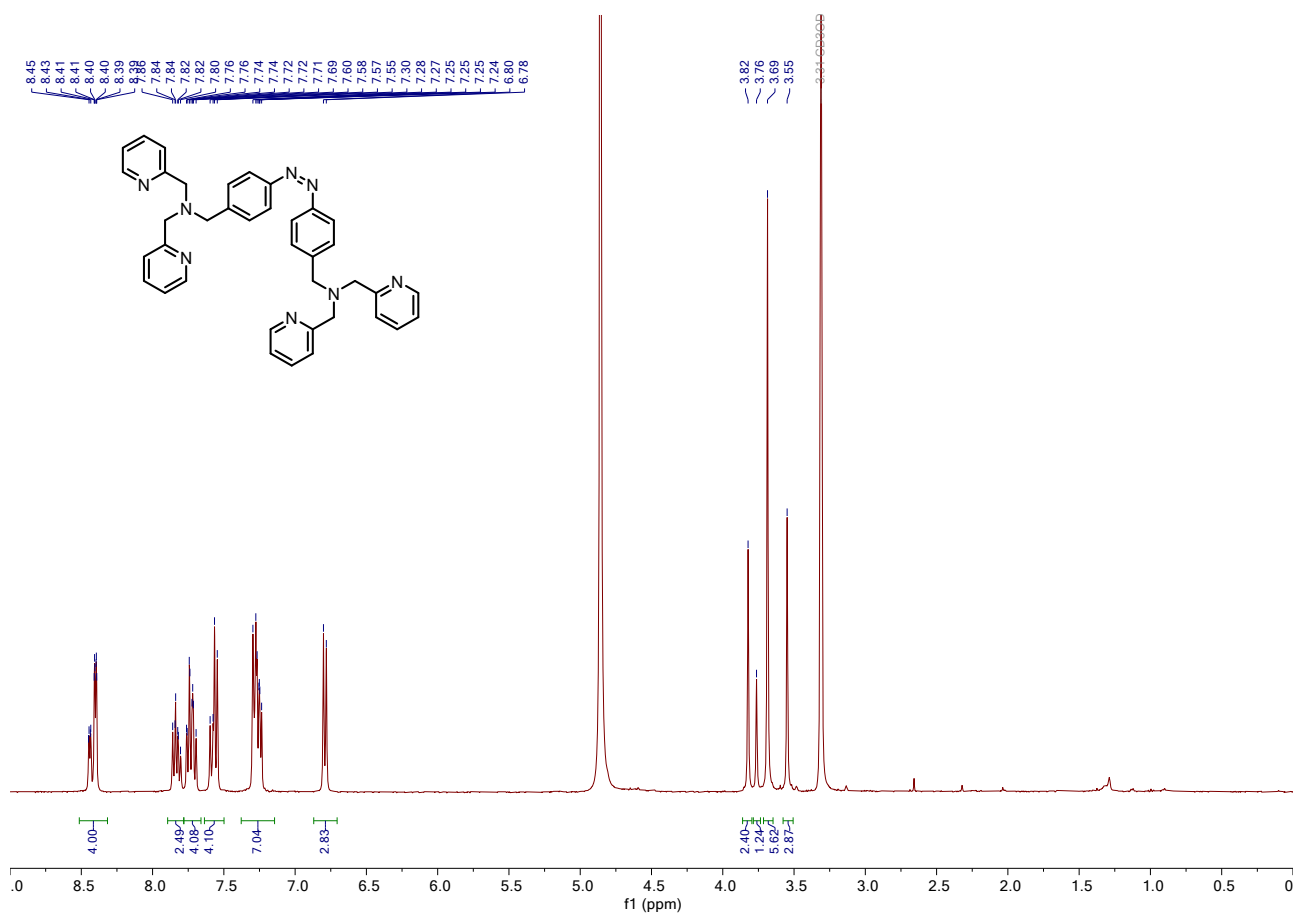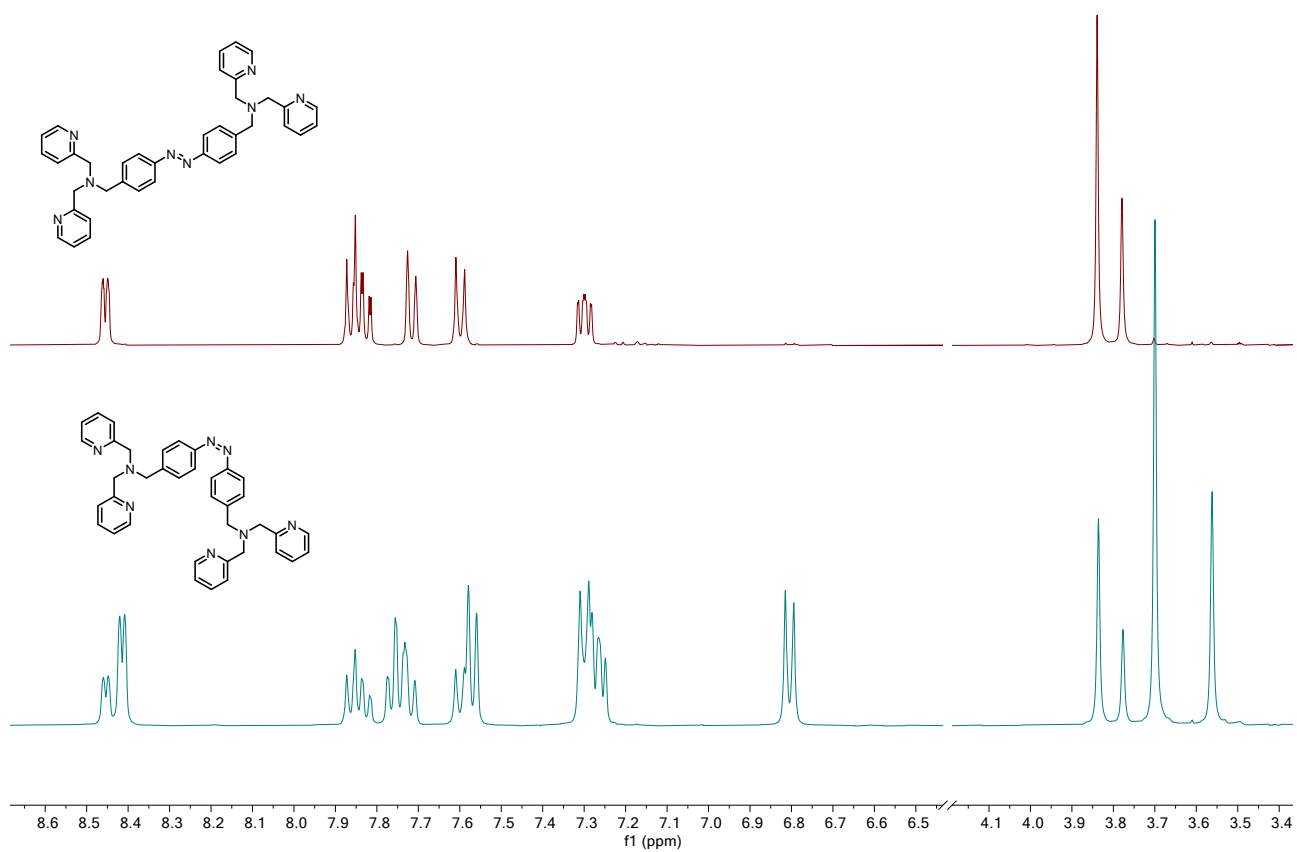

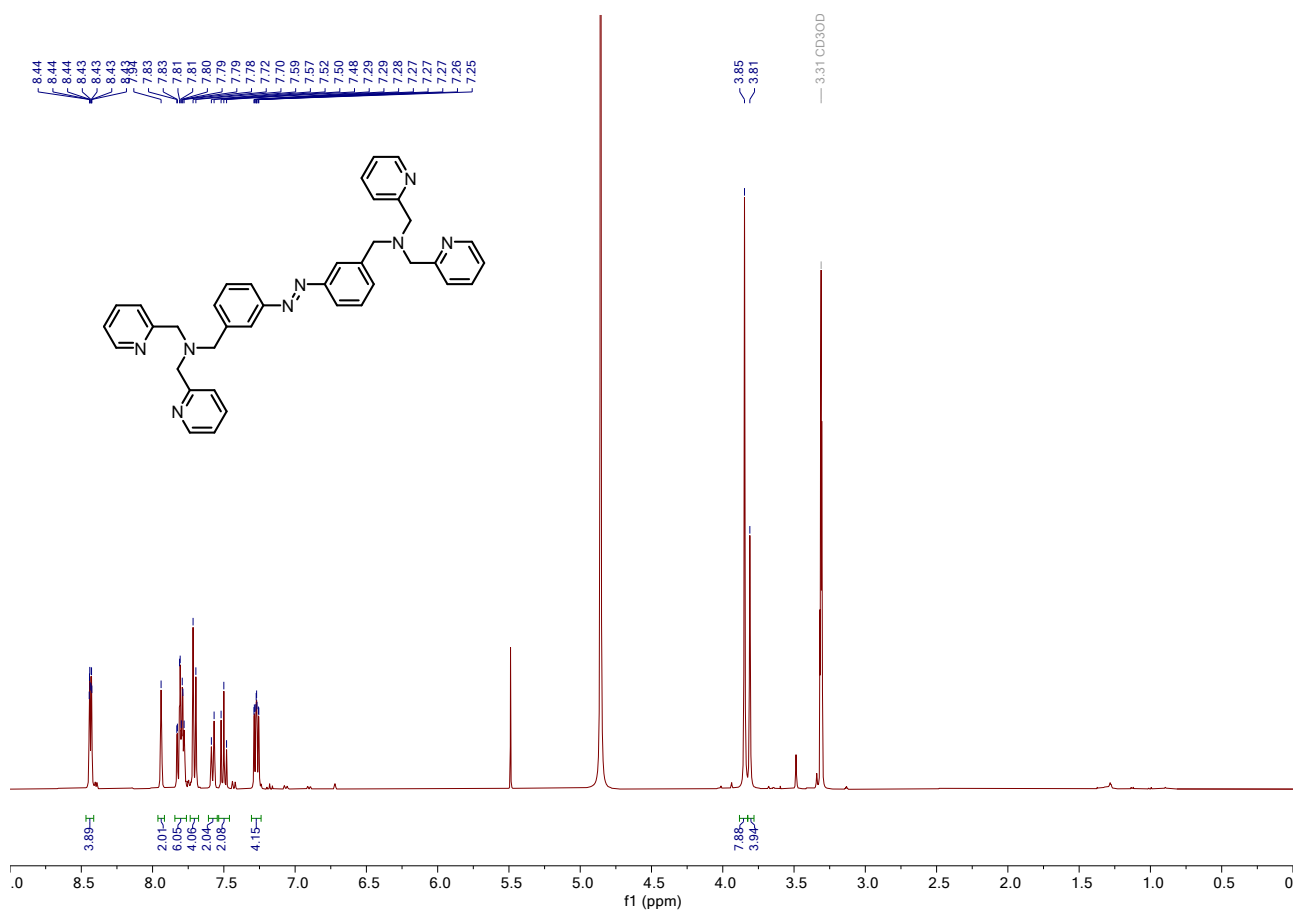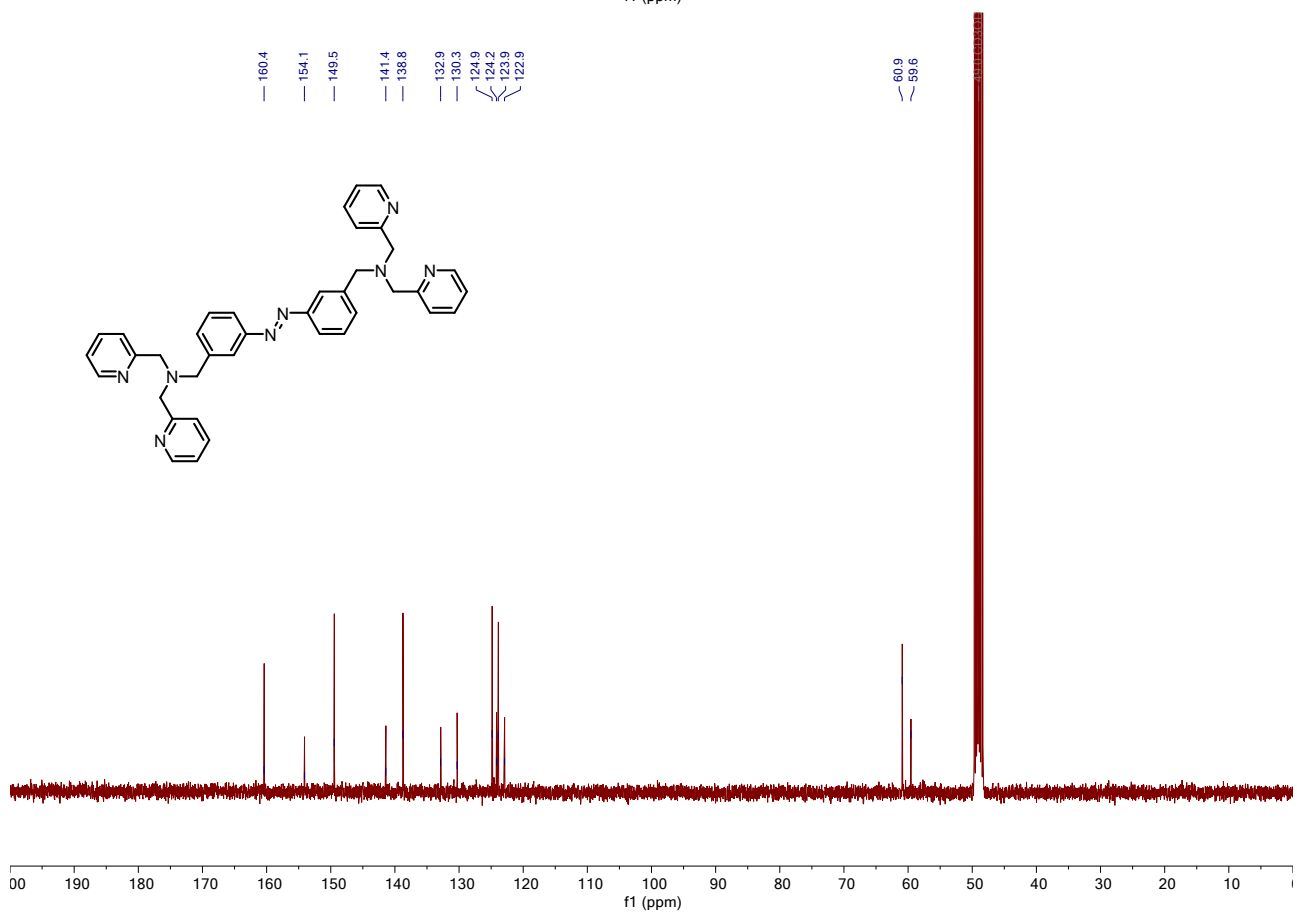





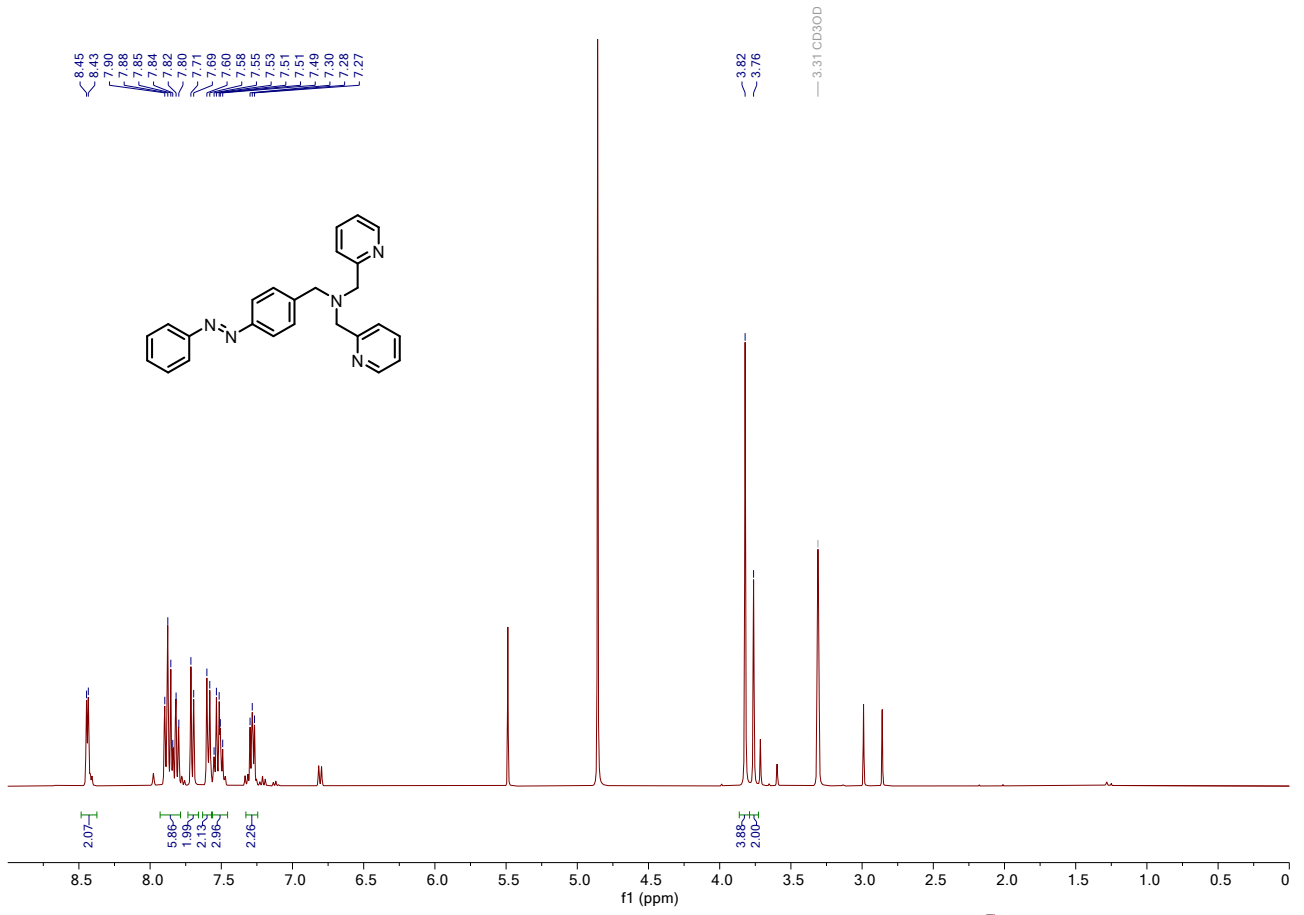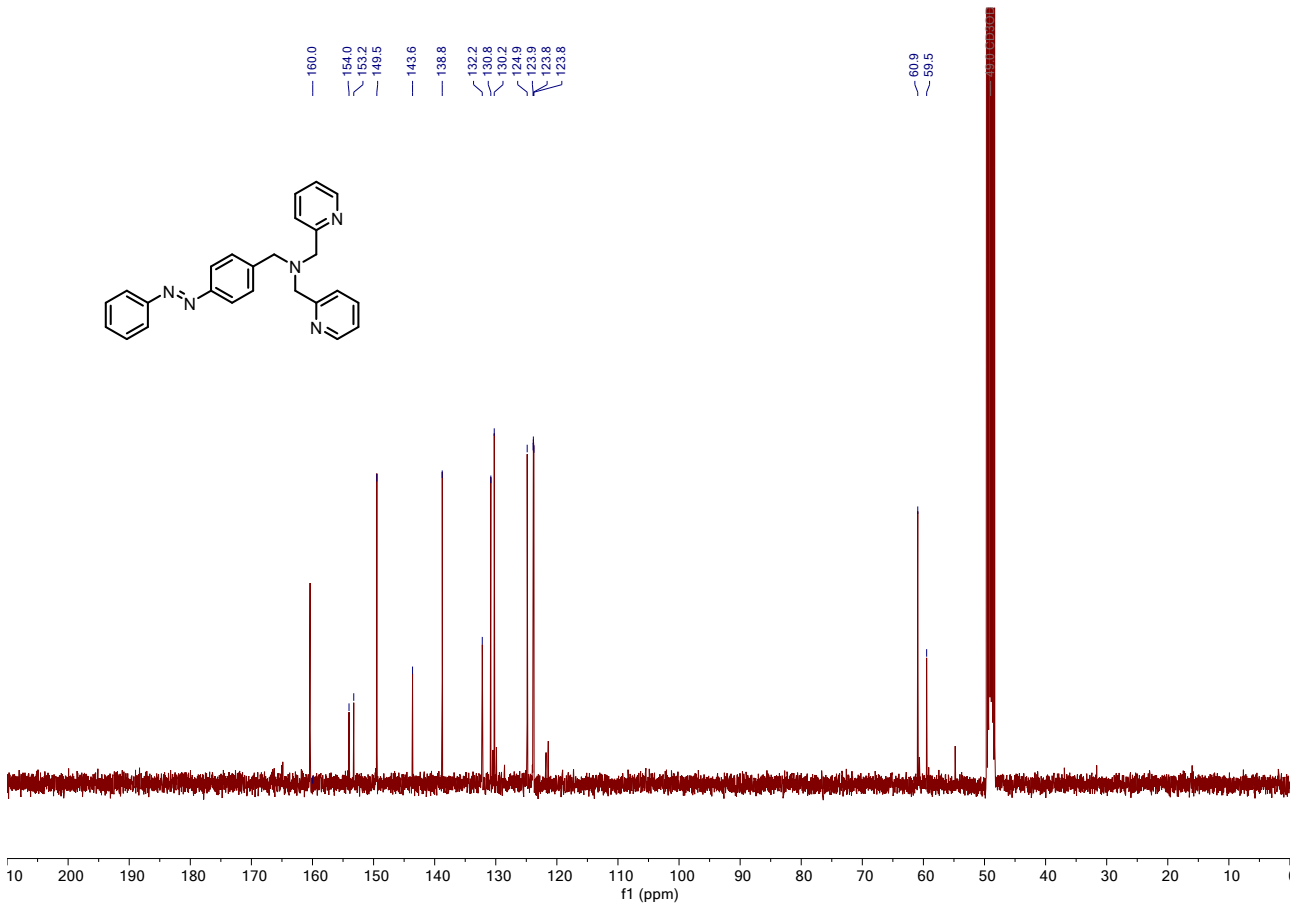

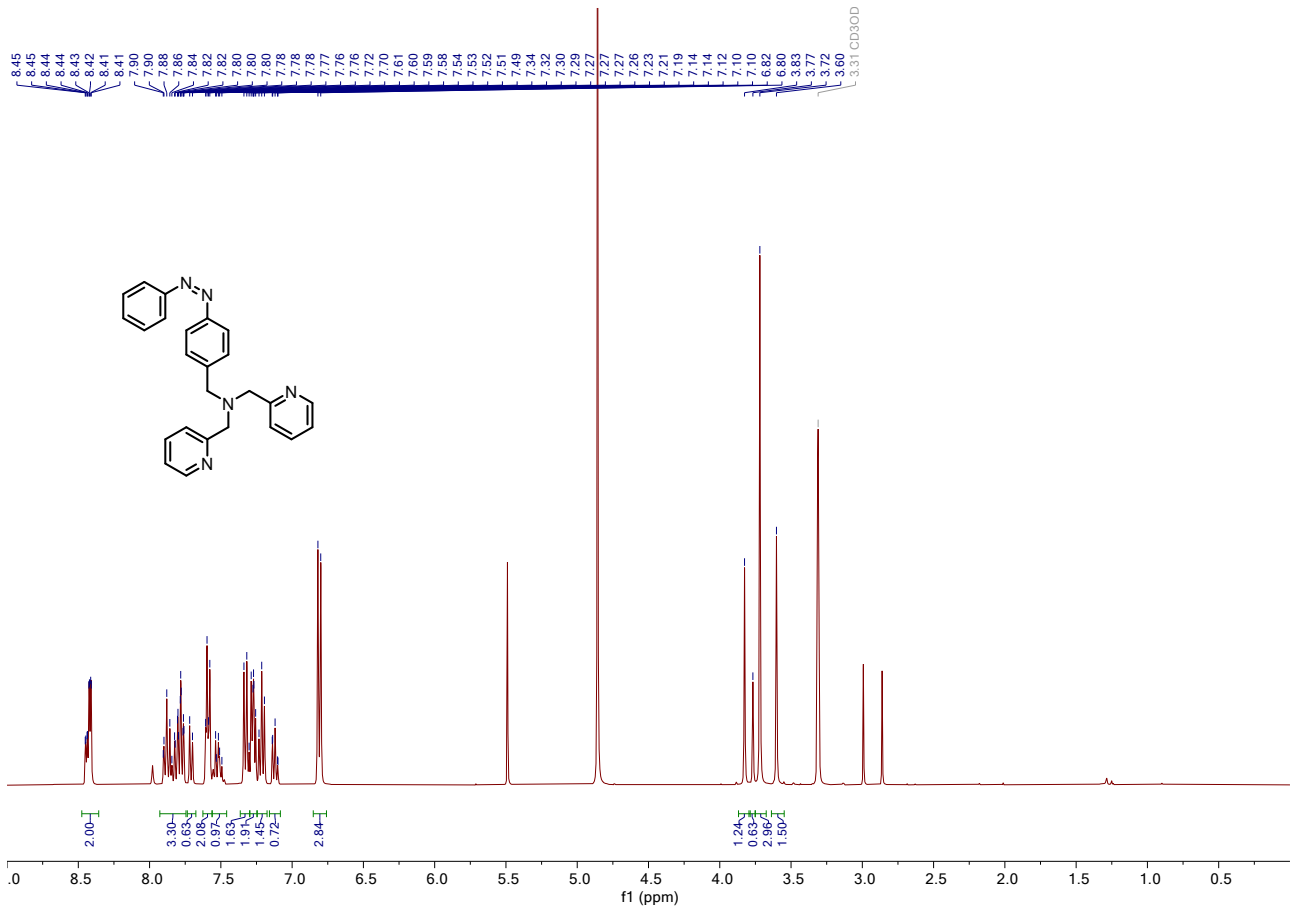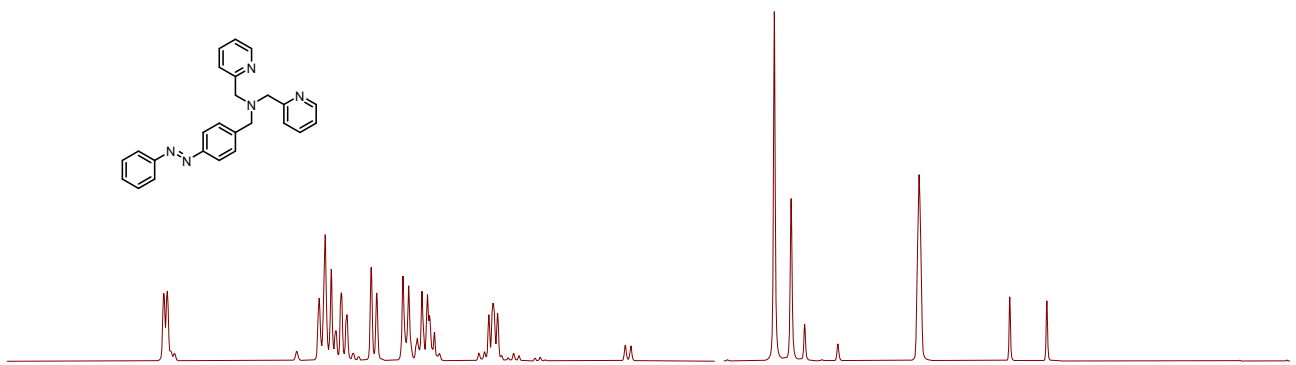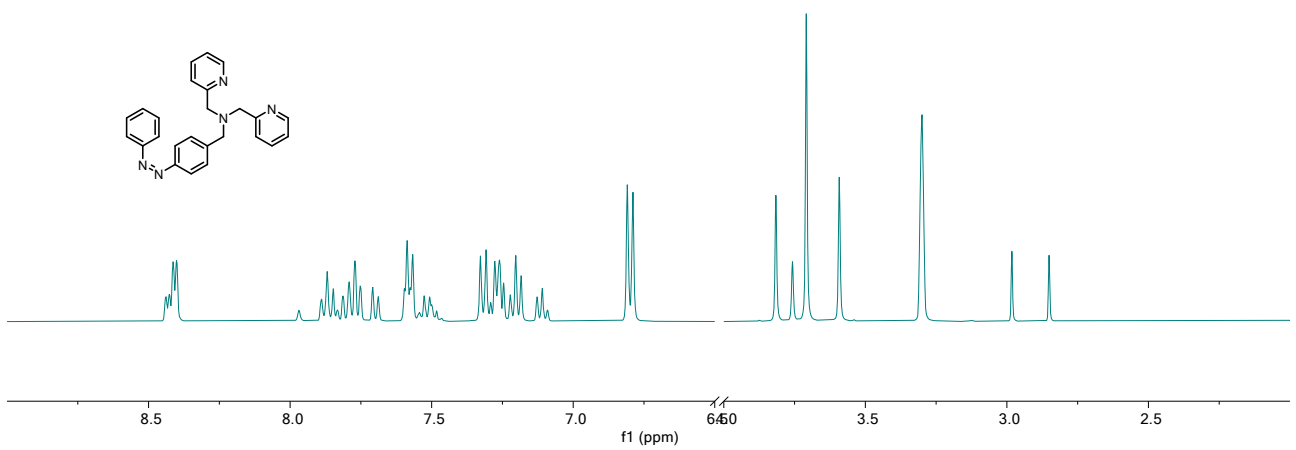

## G. IR spectra

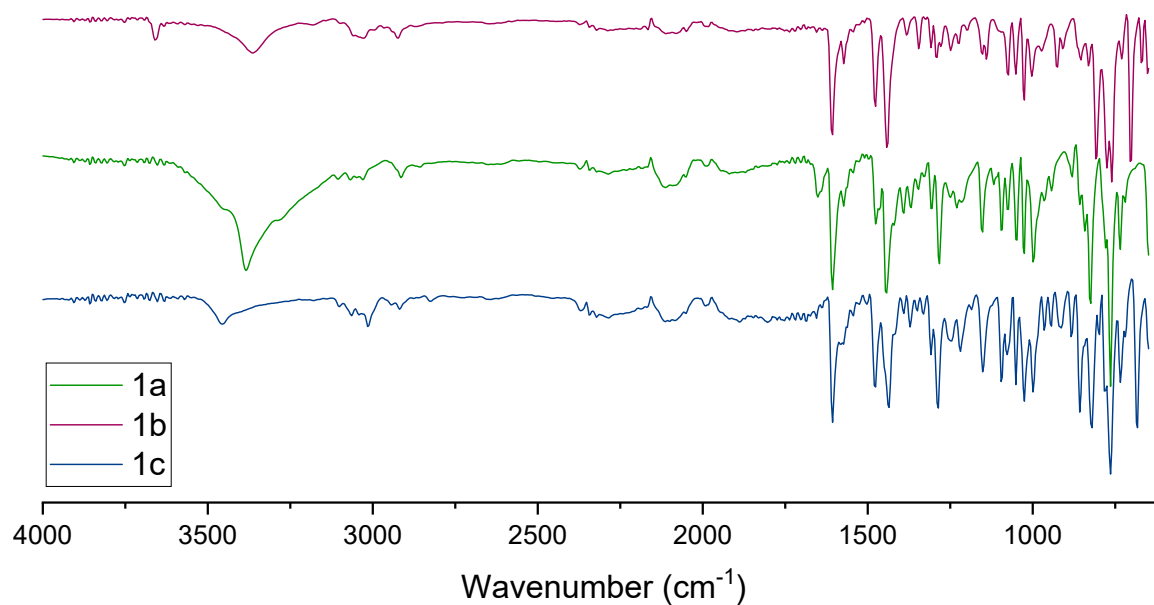

**Figure S- 19.** FT-IR spectra of **1a**, **1b** and **1c**.

## H. Cartesian coordinates

All the cartesian coordinates can be downloaded free of charge from Figshare. The associated DOI for the dataset is the following: [10.6084/m9.figshare.21757619](https://doi.org/10.6084/m9.figshare.21757619).

## I. References

- 1 S. Grimme, A. Hansen, S. Ehlert and J.-M. Mewes, *J. Chem. Phys.*, 2021, **154**, 064103.
- 2 F. Neese, F. Wennmohs, U. Becker and C. Riplinger, *J. Chem. Phys.*, 2020, **152**, 224108.
- 3 B. Priewisch and K. Rück-Braun, *J. Org. Chem.*, 2005, **70**, 2350–2352.
- 4 F. Riefolo, C. Matera, A. Garrido-Charles, A. M. J. Gomila, R. Sortino, L. Agnetta, E. Claro, R. Masgrau, U. Holzgrabe, M. Batlle, M. Decker, E. Guasch and P. Gorostiza, *J. Am. Chem. Soc.*, 2019, **141**, 7628–7636.
- 5 N. A. Simeth, T. Kinateder, C. Rajendran, J. Nazet, R. Merkl, R. Sterner, B. König and A. C. Kneuttinger, *Chem. – A Eur. J.*, 2021, **27**, 2439–2451.
- 6 G. Sheldrick, *Acta Crystallogr. Sect. A*, 2015, **71**, 3–8.
- 7 O. V Dolomanov, L. J. Bourhis, R. J. Gildea, J. A. K. Howard and H. Puschmann, *J. Appl. Crystallogr.*, 2009, **42**, 339–341.
- 8 G. Sheldrick, *Acta Crystallogr. Sect. C*, 2015, **71**, 3–8.
